# Supplementary material for: In Vitro α-Glucosidase and α-Amylase Inhibition, Cytotoxicity and Free Radical Scavenging Profiling of the 6-Halogeno and Mixed 6,8-Dihalogenated 2-Aryl-4-methyl-1,2-dihydroquinazoline 3-Oxides
Source: MDPI journal article supplement (doi:10.3390/antiox12111971), 2023-11-06
Supplement: s1 [file s1]

# ***In Vitro* $\alpha$ -Glucosidase and $\alpha$ -Amylase Inhibition, Cytotoxicity and Free Radical Scavenging Profiling of the 6-Halogeno and Mixed 6,8-Dihalogenated 2-Aryl-4-methyl-1,2-dihydroquinazoline 3-oxides**

N.M. Magwaza, G.K. More, S. Gildenhuis and M.J. Mphahlele

**Fig. S1:** Analytical data for compounds **2a–d** and **3a–p**

**Table S1:** X-ray analysis, crystal data and structure refinement for **3i**

**Fig. S2:** Graphs showing dose-dependent effect on cell viability in HEK293-T, MCF-7 and A549

**Table S2:** Cell viability percentage of compounds **3a–p** against MCF-7 cell line

**Table S3:** Cell viability percentage of compounds **3a–p** against the A549 cell line

**Table S4:** Cell viability percentage of compounds **3a–p** against the HEK293-T cell line

**Fig. S3:** Graphs of % inhibition of SOD used to calculate IC<sub>50</sub> values

**Table S5:** Binding energies of **3a**, **3c**, **3f**, **3i**, **3l** and **3p** docked into  $\alpha$ -glucosidase and  $\alpha$ -amylase

**Fig. S4:** Docking poses of acarbose against  $\alpha$ -glucosidase and  $\alpha$ -amylase

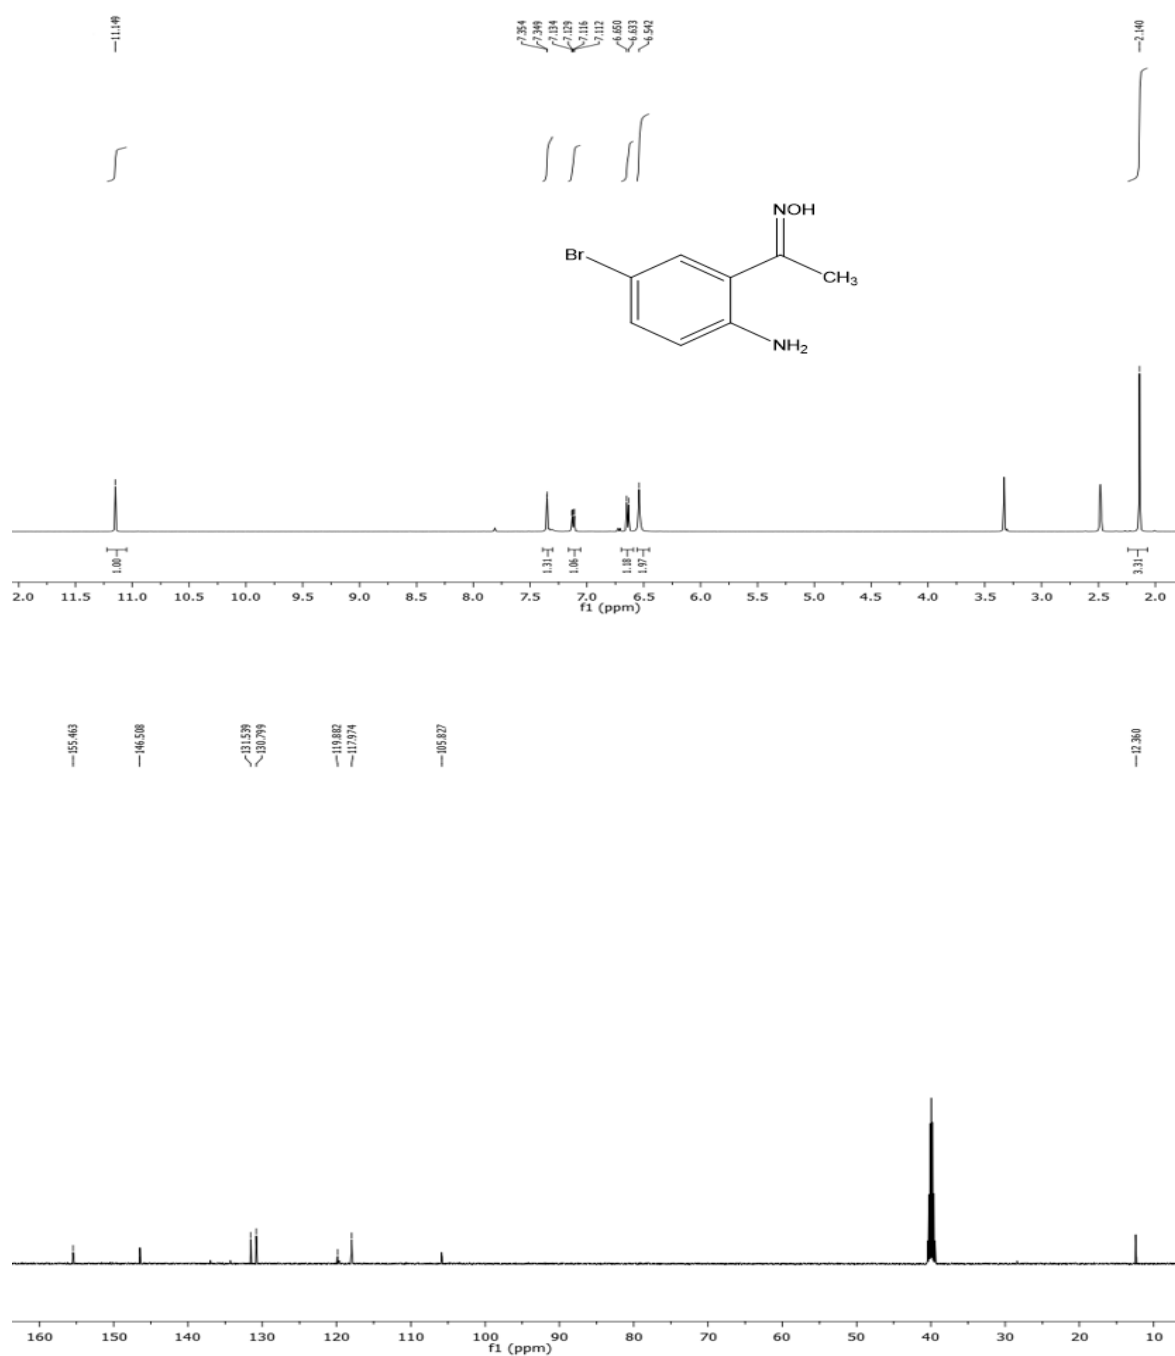

**Figure S1.1:** <sup>1</sup>H- and <sup>13</sup>C-NMR spectra of **2a** in DMSO-*d*<sub>6</sub> at 500 MHz and 125 MHz, respectively

1-(2-Amino-5-bromophenyl)ethan-1-one oxime (**2a**)

White solid (1.85 g, 93%), mp. 159–160 °C (Lit. 161.0–161.5 °C [**1**]);  $\nu_{\text{max}}$  (ATR): 822, 1002, 1278, 1396, 1488, 1615, 2810, 3248, 3349 cm<sup>-1</sup>; <sup>1</sup>H-NMR (500 MHz, DMSO-*d*<sub>6</sub>):  $\delta$  2.30 (s, 3H, -CH<sub>3</sub>), 6.60 (s, 2H, -NH<sub>2</sub>), 7.09 (d, *J* = 6.0 Hz, 1H, H-3), 7.36 (t, *J* = 7.5 Hz, 1H, H-4), 7.42 (d, *J* = 6.0 Hz, 1H, H-6), 7.83 (s, 1H, OH); <sup>13</sup>C-NMR (125 MHz, DMSO-*d*<sub>6</sub>):  $\delta$  12.5, 108.5, 120.6, 131.1, 132.0, 137.2, 144.6, 157.4; HRMS (ES): MH<sup>+</sup>, calcd for C<sub>8</sub>H<sub>9</sub>N<sub>2</sub>OBr: 228.9898; found 228.9974.

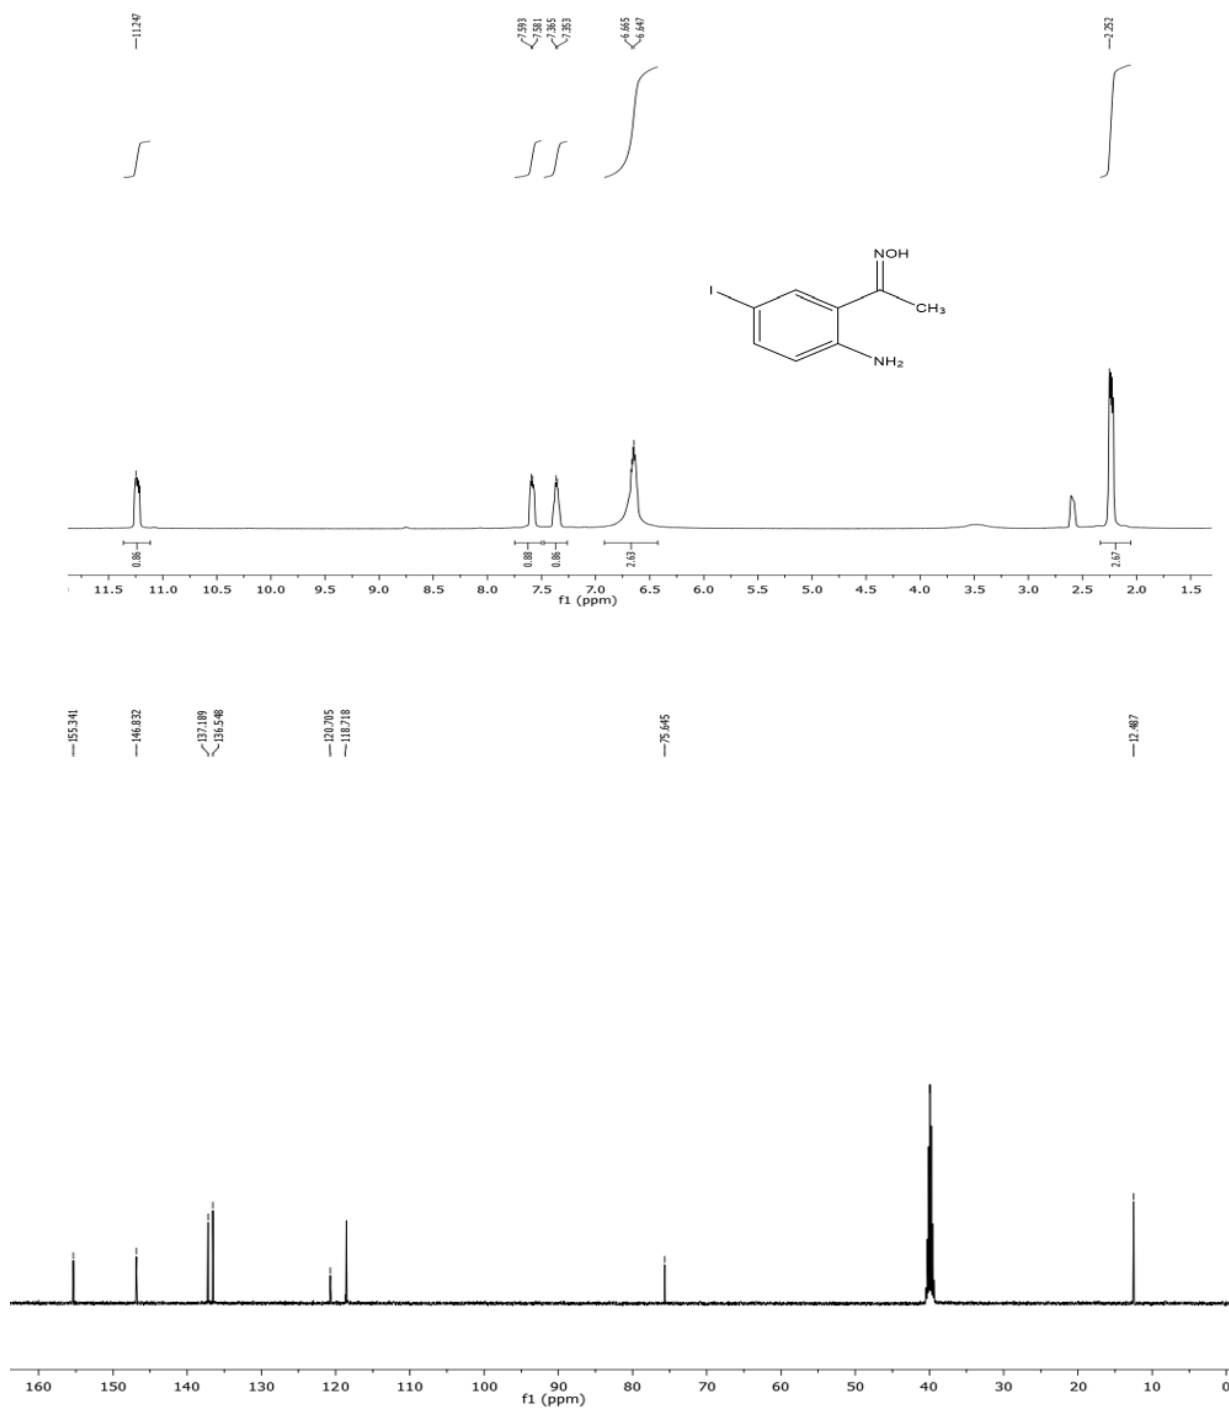

**Figure S1.2:** <sup>1</sup>H- and <sup>13</sup>C-NMR spectra of **2b** in DMSO-*d*<sub>6</sub> at 500 MHz and 125 MHz, respectively.

1-(2-Amino-5-iodophenyl)ethan-1-one oxime (**2b**)

Brown solid (1.78 g, 89%), mp 136–137 °C;  $\nu_{\text{max}}$  (ATR): 818, 1002, 1058, 1278, 1483, 1610, 2983, 3355, 3673  $\text{cm}^{-1}$ ; <sup>1</sup>H-NMR (500 MHz, DMSO-*d*<sub>6</sub>):  $\delta$  2.16 (s, 3H, CH<sub>3</sub>), 6.12 (s, 2H, NH<sub>2</sub>), 7.45 (d,  $J$  = 1.5 Hz, 1H, H-3), 7.59 (d,  $J$  = 1.5 Hz, 1H, H-4), 7.35 (s, 1H, H-6), 11.25 (s, 1H, OH); <sup>13</sup>C-NMR (125 MHz, DMSO-*d*<sub>6</sub>):  $\delta$  12.4, 75.6, 118.6, 120.7, 136.5, 137.2, 146.9, 155.3; HRMS (ES): MH<sup>+</sup>, calcd for C<sub>8</sub>H<sub>9</sub>N<sub>2</sub>OI: 276.9760; found 276.9835.

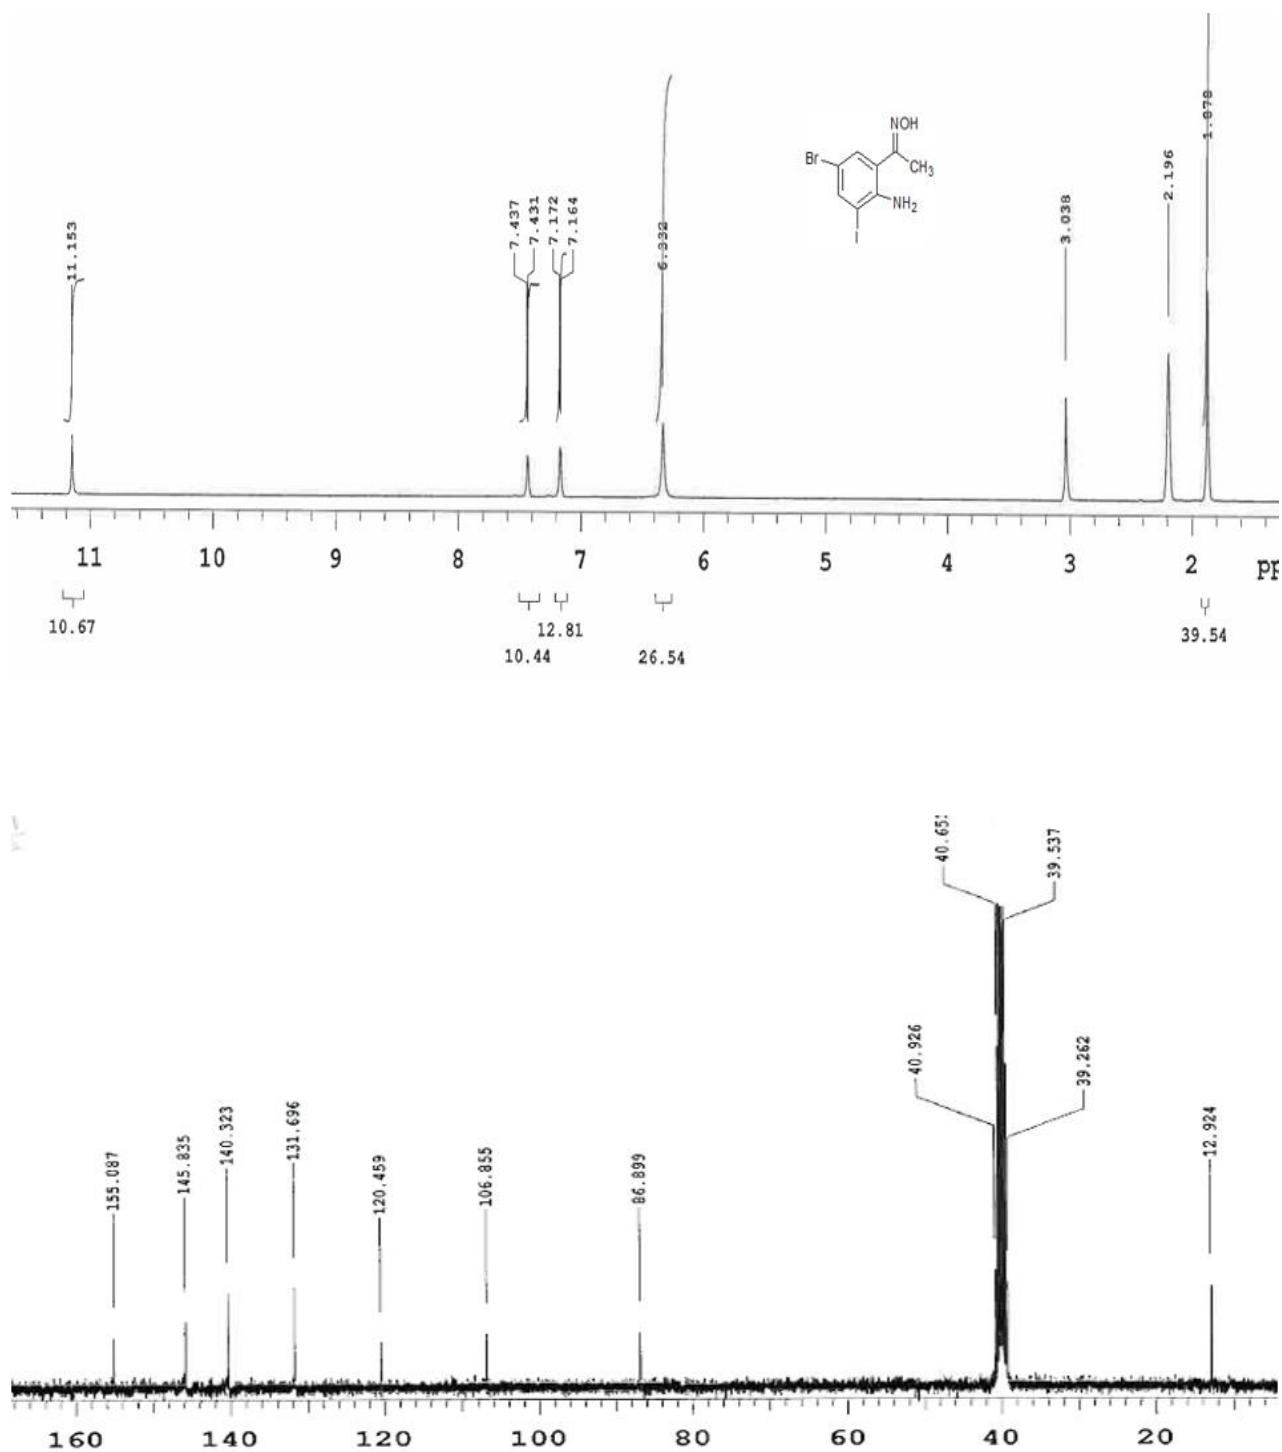

**Figure S1.3:**  $^1\text{H}$ - and  $^{13}\text{C}$ -NMR spectra of **2c** in  $\text{DMSO-}d_6$  at 500 MHz and 125 MHz, respectively.

1-(2-Amino-5-bromo-3-iodophenyl)ethan-1-one oxime (**2c**)

White solid (1.80 g, 90%), mp. 175–176 °C (Lit. 174–176 °C [2]);  $\nu_{\text{max}}$  (ATR): 680, 755, 860, 1002, 1232, 1364, 1425, 1526, 1738, 2833, 3207, 3364  $\text{cm}^{-1}$ ;  $^1\text{H}$ -NMR (500 MHz,  $\text{DMSO-}d_6$ ):  $\delta$  3.94 (s, 3H,  $\text{CH}_3$ ), 6.24 (s, 2H,  $-\text{NH}_2$ ), 7.09 (s, 1H, H-4), 7.36 (s, 1H, H-6), 11.06 (s, 1H, NH);  $^{13}\text{C}$ -NMR (125 MHz,  $\text{DMSO-}d_6$ ):  $\delta$  12.9, 86.9, 106.9, 120.5, 131.7, 140.3, 145.8, 155.1.

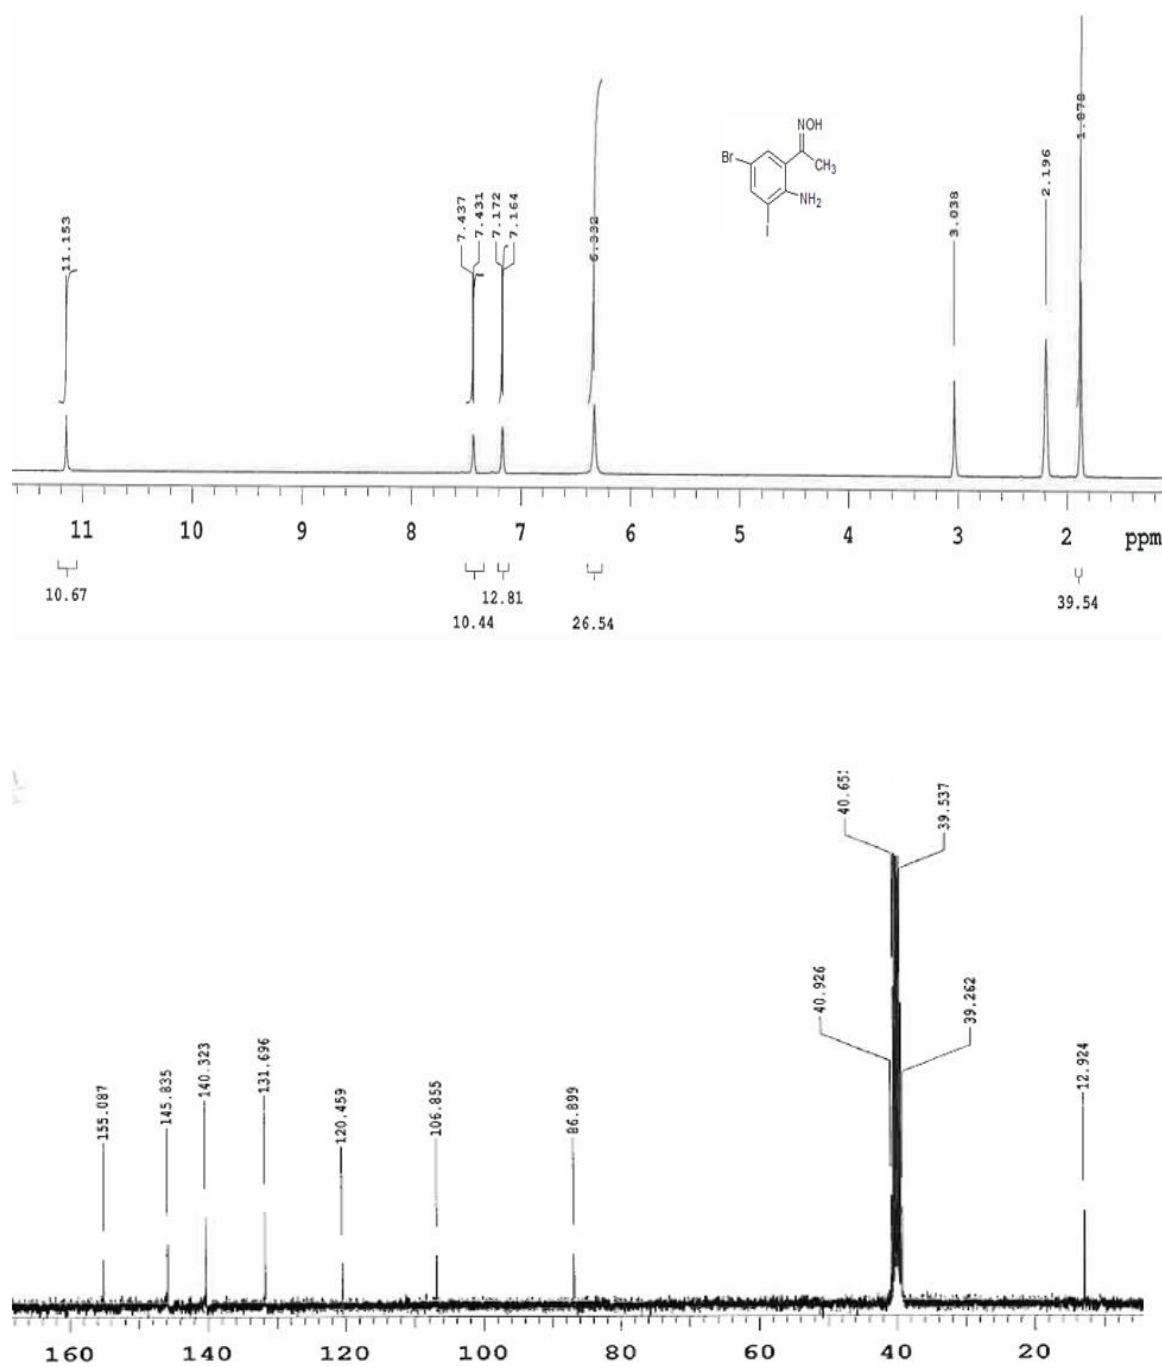

**Figure S1.4:** <sup>1</sup>H- and <sup>13</sup>C-NMR spectra of **2d** in DMSO-*d*<sub>6</sub> at 500 MHz and 125 MHz, respectively.

1-(2-Amino-3-bromo-5-iodophenyl)ethan-1-one oxime (**2d**)

Brown solid (1.78 g, 89%); mp 171–172 °C;  $\nu_{\text{max}}$  (ATR) 862, 1005, 1067, 1233, 1386, 1531, 2990, 3366 cm<sup>-1</sup>; <sup>1</sup>H-NMR (500 MHz, DMSO-*d*<sub>6</sub>): δ 2.16 (s, 3H, CH<sub>3</sub>), 6.62 (s, 2H, NH<sub>2</sub>), 7.45 (d, *J* = 1.5 Hz, 1H, H-4), 7.71 (d, *J* = 1.5 Hz, 1H, H-4), 11.44 (s, 1H, OH); <sup>13</sup>C-NMR (125 MHz, DMSO-*d*<sub>6</sub>) 12.6, 86.5, 106.9, 120.5, 131.5, 140.3, 145.4, 154.8; HRMS (ES): MH<sup>+</sup>, calcd for C<sub>8</sub>H<sub>8</sub>N<sub>2</sub>OBrI: 354.8865; found 354.8943.

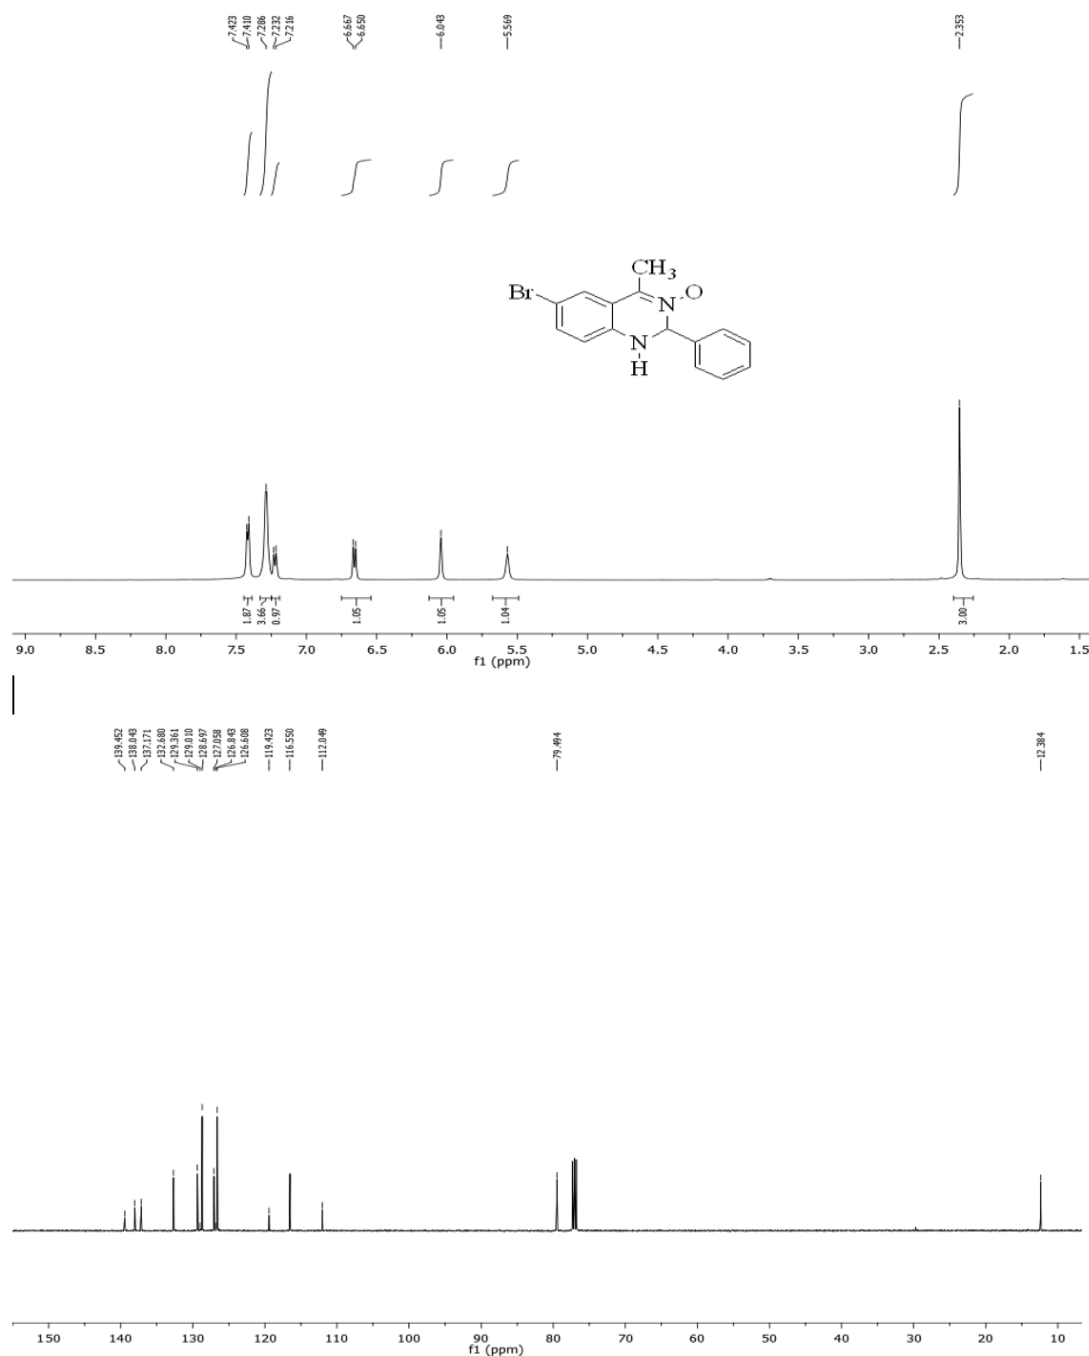

**Figure S1.5:** <sup>1</sup>H- and <sup>13</sup>C-NMR spectra of **3a** in CDCl<sub>3</sub> at 500 MHz and 125 MHz, respectively.

**6-Bromo-4-methyl-2-phenyl-1,2-dihydroquinazoline 3-oxide (3a)**

Yellow solid (0.30 g, 62%), *R<sub>f</sub>* (5% EtOAc–toluene) 0.64, mp 158–160 °C (Lit. 160–161°C [1]); *v*<sub>max</sub> (ATR) 815, 1072, 1199, 1268, 1407, 1492, 1564, 1600, 2987, 3237 cm<sup>-1</sup>; <sup>1</sup>H-NMR (500 MHz, CDCl<sub>3</sub>): δ 2.35 (s, 3H, -CH<sub>3</sub>), 5.57 (s, 1H, H-2), 6.04 (s, 1H, NH), 6.65 (d, *J* = 8.5 Hz, 1H, H-8), 7.22 (d, *J* = 8.0 Hz, 1H, H-7), 7.23–7.29 (m, 4H, H-2',6' and H-3',5'), 7.42 (d, *J* = 6.5 Hz, 2H, H-4' and H-5); <sup>13</sup>C-NMR (125 MHz, CDCl<sub>3</sub>): δ 12.4, 79.5, 112.0, 116.6, 132.0, 119.4, 126.6, 126.8, 127.1, 128.7, 129.0, 129.4, 132.7, 137.2, 138.0, 139.5; HRMS (ES): MH<sup>+</sup>, calcd for C<sub>15</sub>H<sub>14</sub>N<sub>2</sub>OBr: 317.0211; found 317.0289.

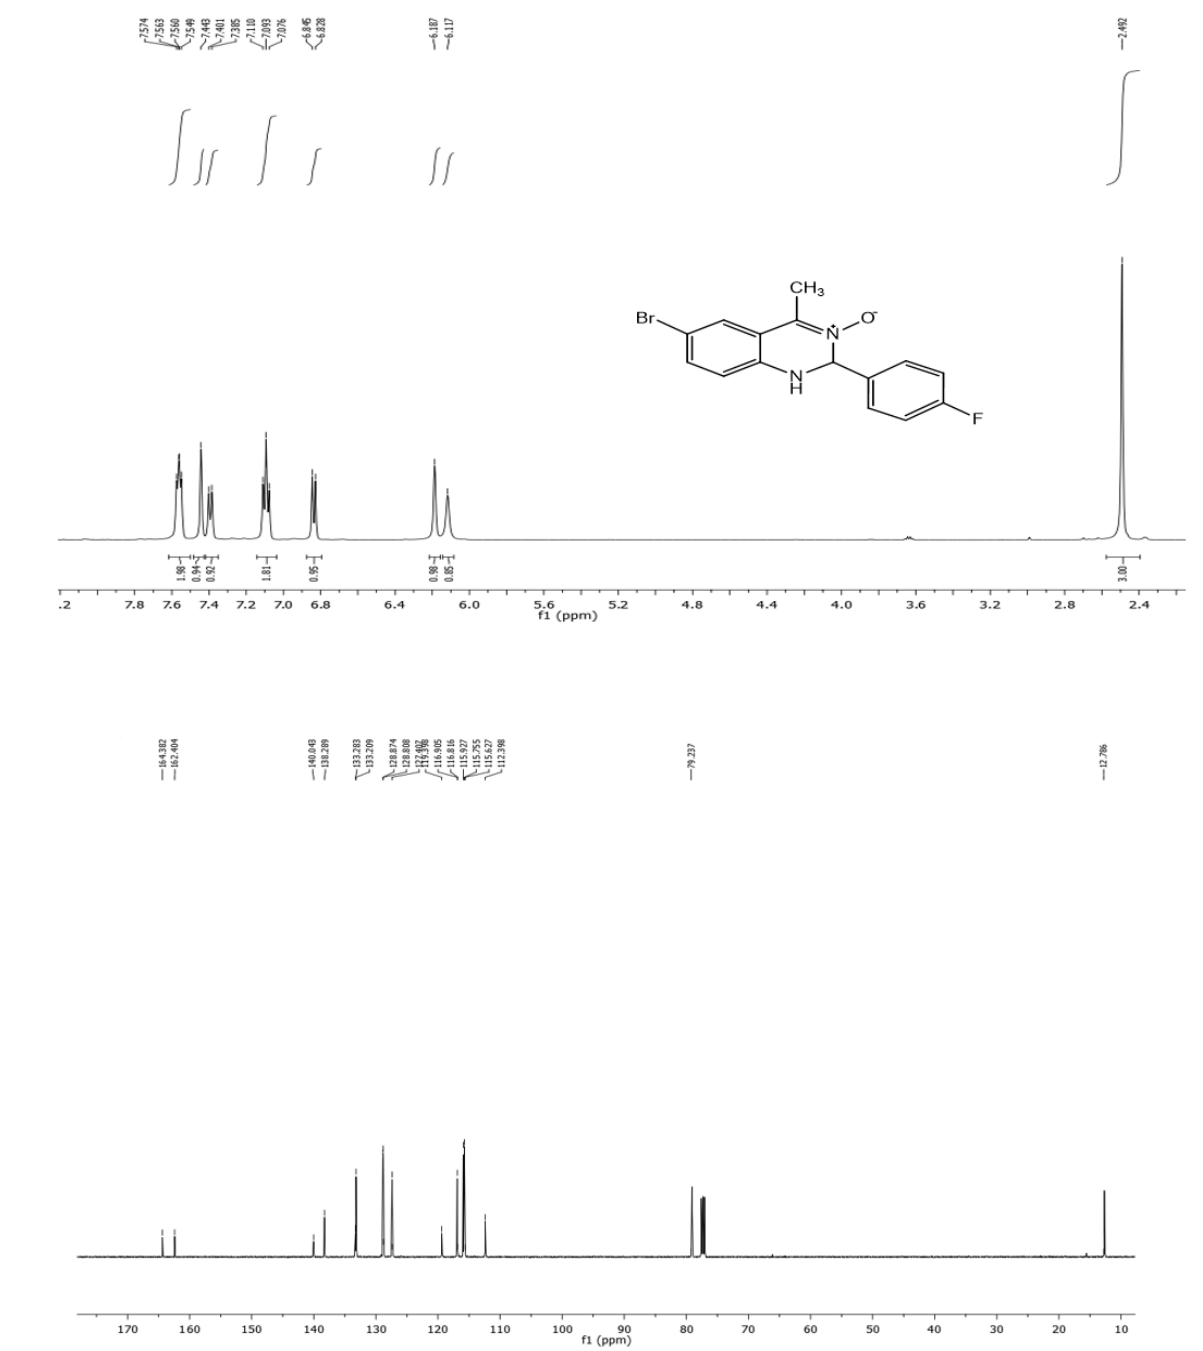

**Figure S1.6:** <sup>1</sup>H- and <sup>13</sup>C-NMR spectra of **3b** in CDCl<sub>3</sub> at 500 MHz and 125 MHz, respectively.

**6-Bromo-2-(4-fluorophenyl)-4-methyl-1,2-dihydroquinazoline 3-oxide (**3b**)**

Yellow solid (0.25 g, 50%), *R<sub>f</sub>* (5% EtOAc–toluene) 0.65; mp 183–185 °C; *v*<sub>max</sub> (ATR) 817, 1158, 1197, 1501, 1600, 3001, 3057, 3199, 3234 cm<sup>-1</sup>; <sup>1</sup>H-NMR (500 MHz, CDCl<sub>3</sub>): δ 2.48 (s, 3H, -CH<sub>3</sub>), 6.10 (s, 1H, H-2), 6.19 (s, 1H, NH), 6.83 (d, *J* = 8.5 Hz, 1H, H-8), 7.10 (t, *J* = 8.5 Hz, 2H, H-3',5'), 7.40 (d, *J* = 8.0 Hz, 1H, H-7), 7.44 (s, 1H, H-5), 7.57 (dd, *J*<sub>HH</sub> = 5.5 Hz and *J*<sub>HH</sub> = 7.0 Hz, 2H, H-2',6'); <sup>13</sup>C-NMR (125 MHz, CDCl<sub>3</sub>): δ 12.9, 79.2, 112.4, 115.6 (d, <sup>2</sup>*J*<sub>CF</sub> = 21.5 Hz), 116.8, 116.9, 119.4, 127.4, 128.8 (d, <sup>3</sup>*J*<sub>CF</sub> = 8.3 Hz), 130.9, 132.8 (d, <sup>2</sup>*J*<sub>CF</sub> = 2.7 Hz), 135.3, 138.3, 140.0, 162.4 (d, <sup>2</sup>*J*<sub>CF</sub> = 247.3); HRMS (ES): *M*H<sup>+</sup>, calcd for C<sub>15</sub>H<sub>12</sub>N<sub>2</sub>OBrF: 335.0117; found 335.0200.





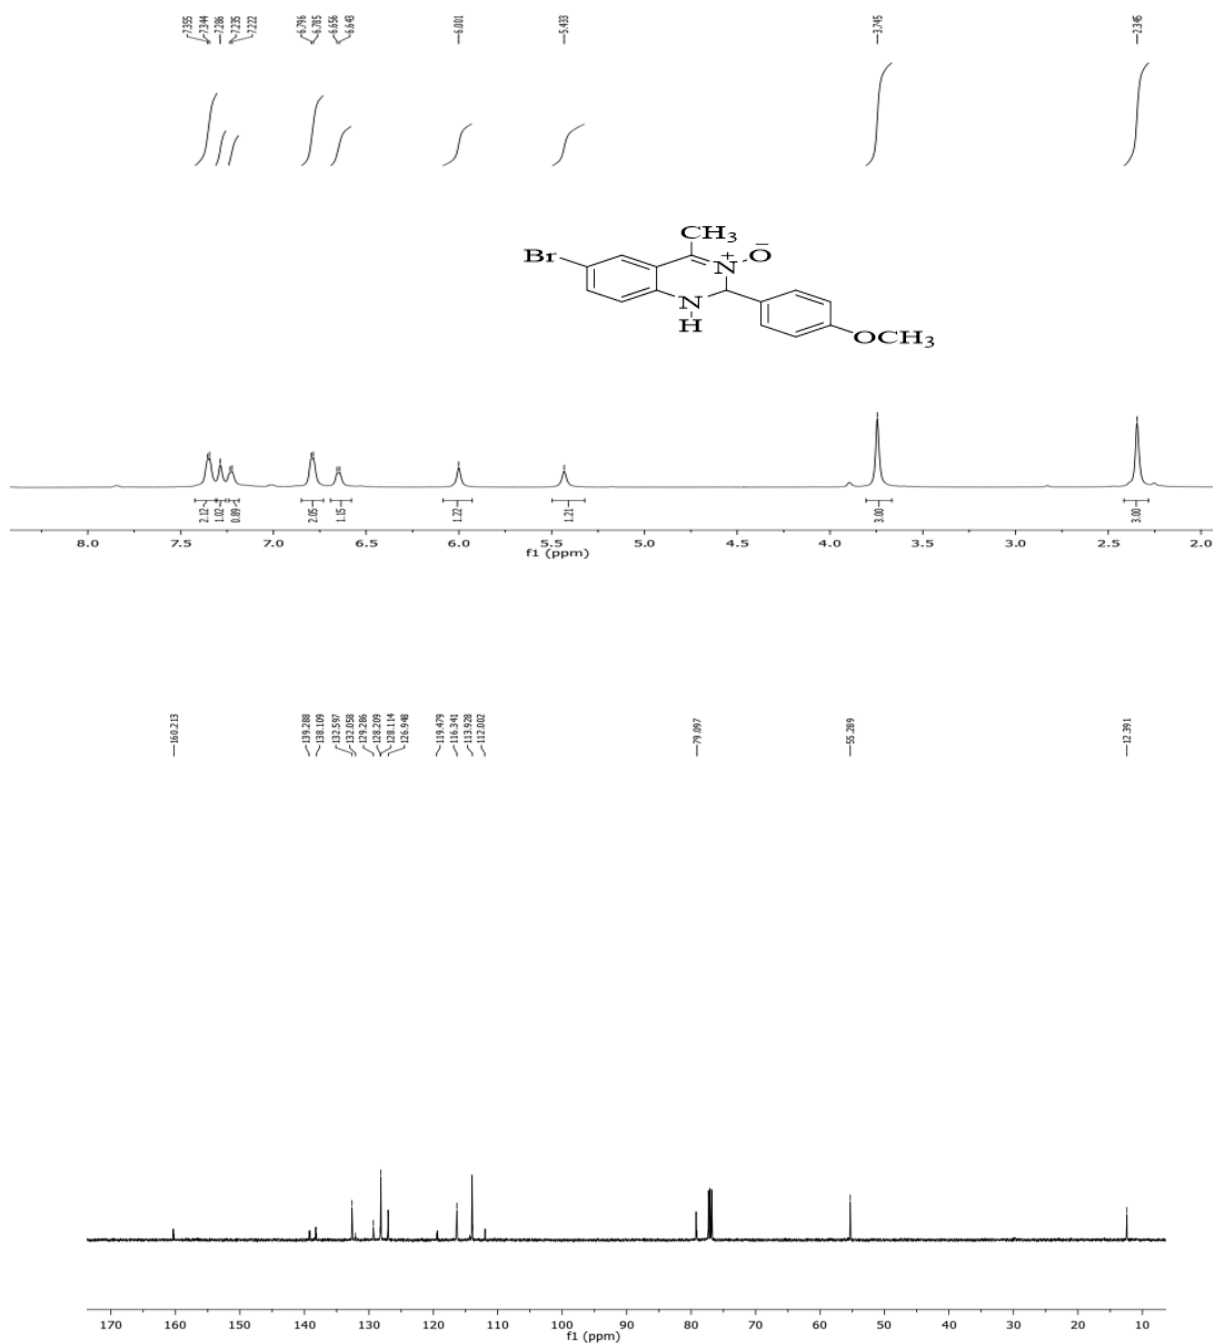

**Figure S1.8:**  $^1\text{H}$ - and  $^{13}\text{C}$ -NMR spectra of **3d** in  $\text{CDCl}_3$  at 500 MHz and 125 MHz, respectively.

6-Bromo-2-(4-methoxyphenyl)-4-methyl-1,2-dihydroquinazoline 3-oxide (**3d**)

Yellow solid (0.45 g, 90%),  $R_f$  (5% EtOAc–toluene) 0.62, mp 194–196 °C;  $\nu_{\text{max}}$  (ATR) 825, 1028, 1199, 1291, 1469, 1517, 1600, 2960, 3281  $\text{cm}^{-1}$ ;  $^1\text{H}$ -NMR (500 MHz,  $\text{CDCl}_3$ ):  $\delta$  2.35 (s, 3H,  $-\text{CH}_3$ ), 5.43 (s, 1H, H-2), 6.00 (s 1H, NH), 6.65 (1H, d,  $J = 6.5$  Hz, H-8), 6.79 (2H, d,  $J = 5.5$  Hz, H-3',5'), 7.22 (d,  $J = 6.5$  Hz, 1H, H-7), 7.35 (d,  $J = 5.5$  Hz, 2H, H-2',6');  $^{13}\text{C}$ -NMR (125 MHz,  $\text{CDCl}_3$ ):  $\delta$  12.4, 55.3, 79.1, 112.0, 113.9, 116.3, 119.5, 126.9, 128.1, 128.2, 129.3, 132.0, 132.6, 138.1, 139.3, 160.2; HRMS (ES):  $\text{MH}^+$ , calcd for  $\text{C}_{16}\text{H}_{16}\text{N}_2\text{O}_2\text{Br}$ : 346.0317; found 347.0391.

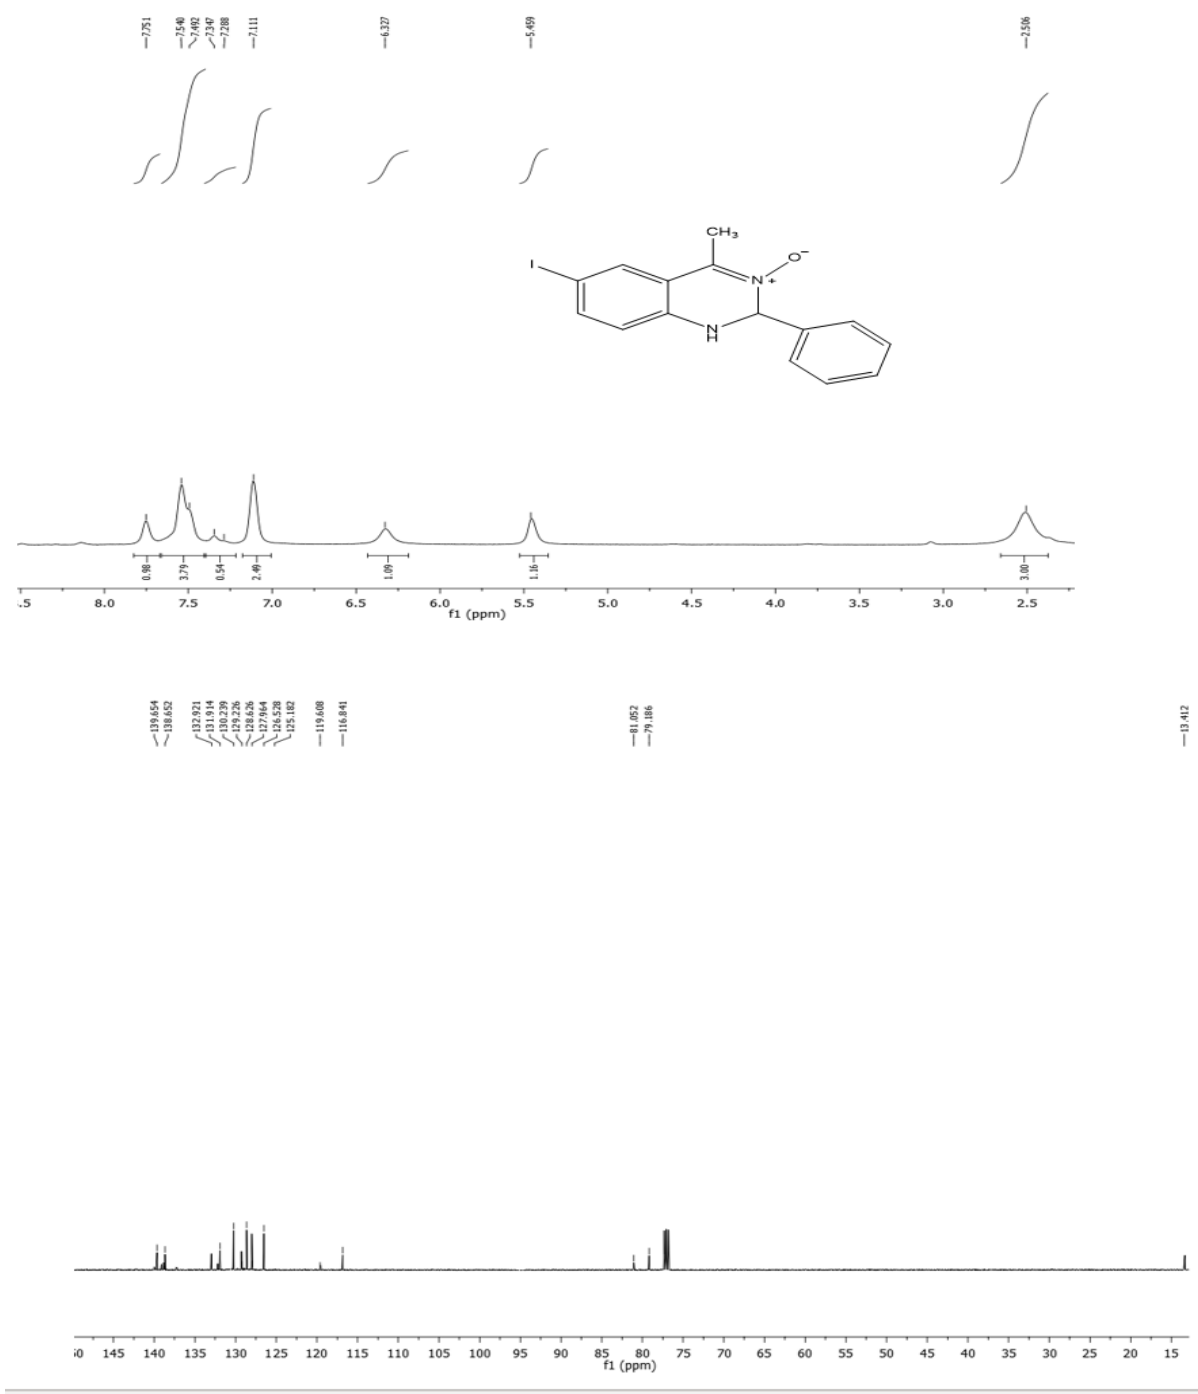

**Figure S1.9:** <sup>1</sup>H- and <sup>13</sup>C-NMR spectra of **3e** in CDCl<sub>3</sub> at 500 MHz and 125 MHz, respectively.

**6-Iodo-4-methyl-2-phenyl-1,2-dihydroquinazoline 3-oxide (3e)**

Yellow solid (0.34 g, 68%), *R<sub>f</sub>* (5% EtOAc–toluene) 0.63, mp 184–186 °C; *v*<sub>max</sub> (ATR) 815, 1028, 1180, 1268, 1489, 1561, 1599, 2987, 3156, 3228 cm<sup>-1</sup>; <sup>1</sup>H-NMR (500 MHz, CDCl<sub>3</sub>): δ 2.52 (s, 3H, -CH<sub>3</sub>), 5.36 (s, 1H, H-2), 6.27 (s, 1H, NH), 6.70 (d, 1H, *J* = 6.5 Hz, H-8), 7.44 (m, 3H, H-4' and H-2',6'), 7.55–7.59 (m, 4H, H-3',5', H-5 and H-7); <sup>13</sup>C-NMR (125 MHz, CDCl<sub>3</sub>) δ 13.4, 79.2, 81.1, 116.8, 119.6, 125.2, 126.5, 127.9, 128.6, 129.2, 130.2, 131.9, 132.9, 138.7, 139.7; HRMS (ES<sup>+</sup>): *m/z* [M + H]<sup>+</sup> calcd for C<sub>15</sub>H<sub>14</sub>N<sub>2</sub>OI: 365.0073; found 365.0149.

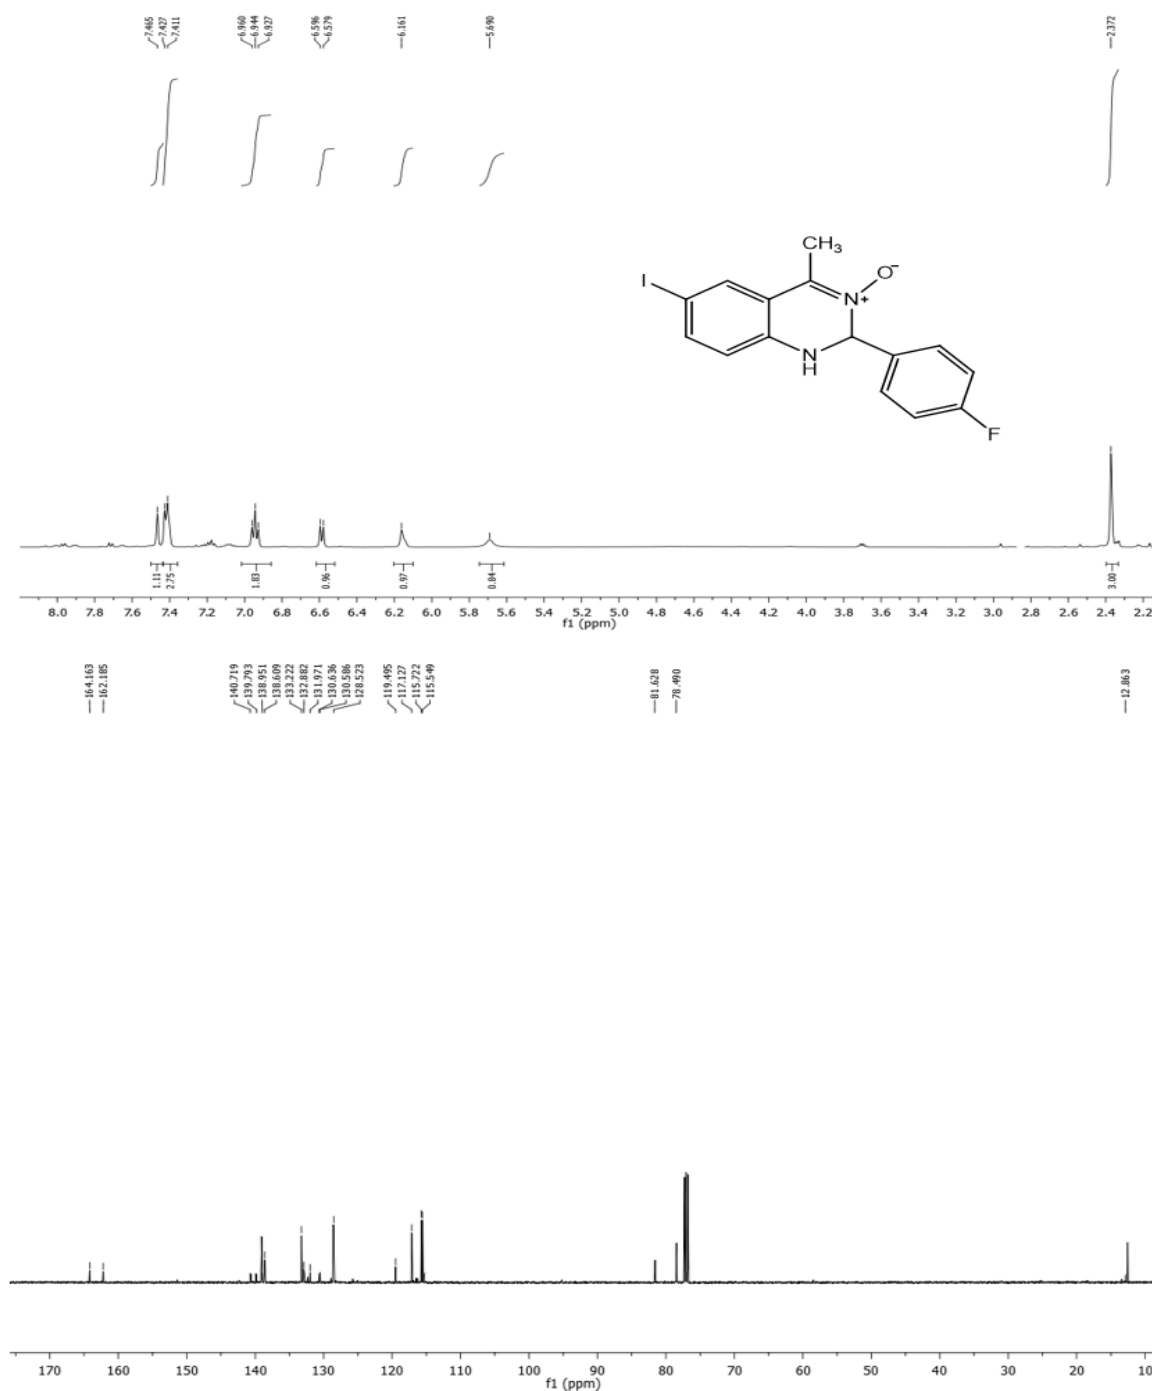

**Figure S1.10:**  $^1\text{H}$ - and  $^{13}\text{C}$ -NMR spectra of **3f** in  $\text{CDCl}_3$  at 500 MHz and 125 MHz, respectively.

**2-(4-Fluorophenyl)-6-iodo-4-methyl-1,2-dihydroquinazoline 3-oxide (**3f**)**

Yellow solid (0.36 g, 72%),  $R_f$  (5% EtOAc–toluene) 0.64; mp 180–182 °C;  $\nu_{\text{max}}$  (ATR) 813, 1083, 1185, 1286, 1489, 1506, 1596, 1603, 2902, 2974, 3216  $\text{cm}^{-1}$ ;  $^1\text{H}$ -NMR (500 MHz,  $\text{CDCl}_3$ ):  $\delta$  2.37 (s, 3H,  $-\text{CH}_3$ ), 5.67 (s, 1H, H-2), 6.16 (s, 1H, NH), 6.56 (d,  $J = 8.5$  Hz, 1H, H-8), 6.94 (t,  $J = 8.5$  Hz, 2H, H-3',5'), 7.41 (d,  $J = 8.0$  Hz, 3H, H-2',6' and H-7), 7.47 (s, 1H, H-5);  $^{13}\text{C}$ -NMR (125 MHz,  $\text{CDCl}_3$ ):  $\delta$  12.9, 78.5, 81.6, 115.5 (d,  $^2J_{\text{CF}} = 21.6$  Hz), 117.2, 119.5, 128.5, 130.6 (d,  $^3J_{\text{CF}} = 8.2$  Hz), 131.9, 132.8 (d,  $^2J_{\text{CF}} = 2.7$  Hz), 133.2, 138.6, 138.9, 140.7, 163.2 (d,  $^2J_{\text{CF}} = 247.3$  Hz); HRMS (ES):  $\text{MH}^+$ , calcd for  $\text{C}_{15}\text{H}_{12}\text{N}_2\text{OFI}$ : 382.9978; found 382.9811.

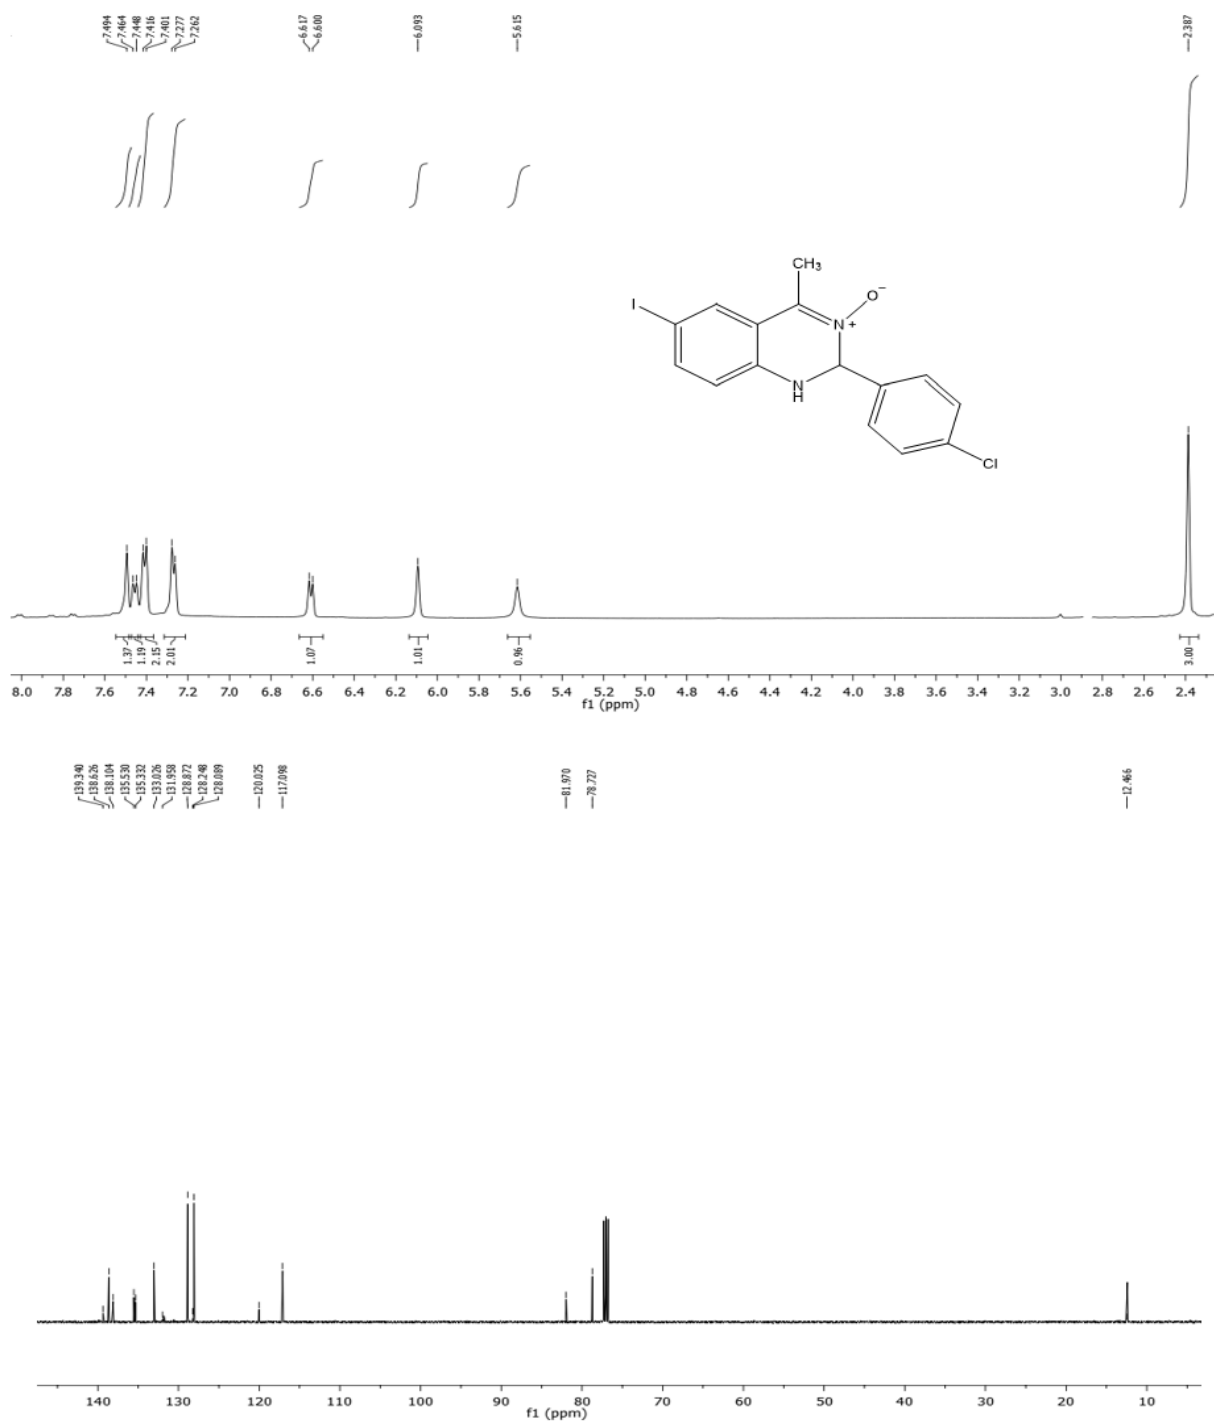

**Fig. S1.11:** <sup>1</sup>H- and <sup>13</sup>C-NMR spectra of **3g** in CDCl<sub>3</sub> at 500 MHz and 125 MHz, respectively.

**6-Iodo-2-(4-Chlorophenyl)-6-iodo-4-methyl-1,2-dihydroquinazoline 3-oxide (**3g**)**

Yellow solid (0.44 g, 88%), *R<sub>f</sub>* (5% EtOAc–toluene) 0.65, mp 182–184 °C; *v*<sub>max</sub> (ATR) 818, 1012, 1092, 1199, 1272, 1404, 1485, 1564, 1601, 2987, 3225 cm<sup>-1</sup>; <sup>1</sup>H-NMR (500 MHz, CDCl<sub>3</sub>): δ 2.39 (s, 3H, -CH<sub>3</sub>), 5.62 (s, 1H, H-2), 6.01 (s, 1H, NH), 6.61 (d, *J* = 8.5 Hz, 1H, H-8), 7.26 (d, *J* = 7.5 Hz, 2H, H-2',6'), 7.40 (d, *J* = 7.5 Hz, 2H, H-3',5'), 7.45 (d, *J* = 8.0 Hz, 1H, H-7), 7.49 (s, 1H, H-5); <sup>13</sup>C-NMR (125 MHz, CDCl<sub>3</sub>): δ 12.6, 78.7, 82.1, 117.3, 119.8, 128.2, 129.1, 130.8, 132.1, 133.1, 134.4, 135.7, 138.2, 139.1, 139.8; HRMS (ES): *M*H<sup>+</sup>, calcd for C<sub>15</sub>H<sub>13</sub>N<sub>2</sub>OClI<sub>2</sub>: 397.9683; found 398.9760.

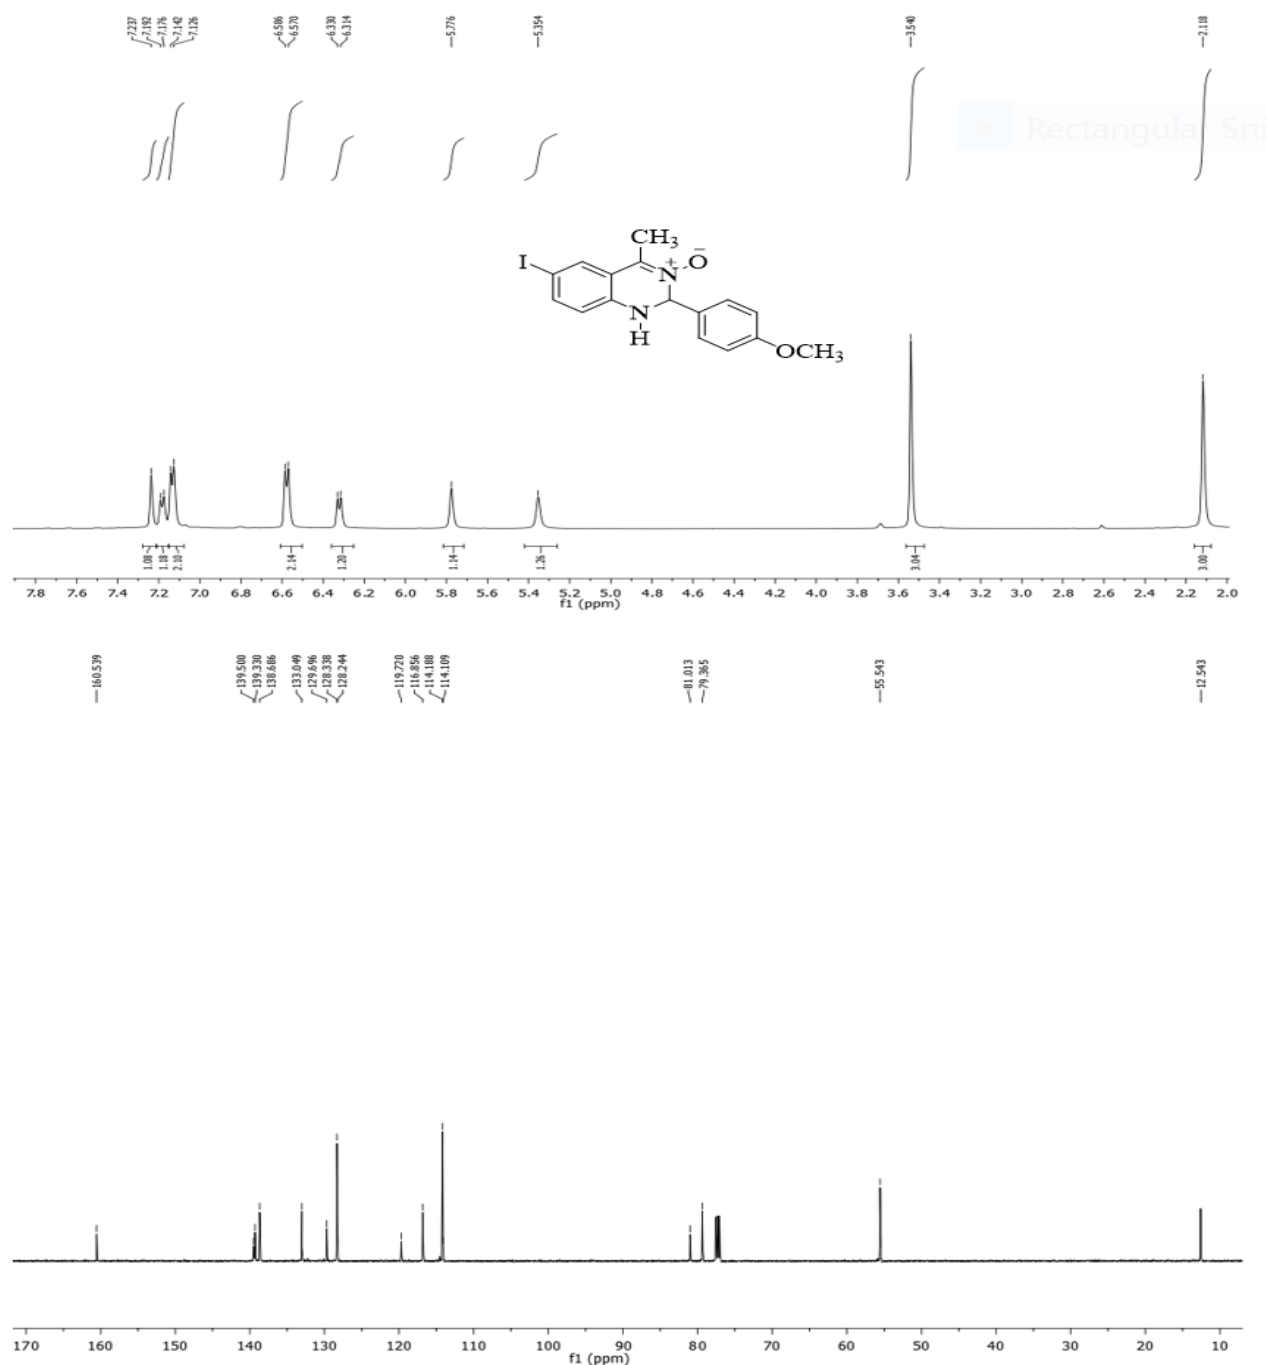

**Fig. S1.12:**  $^1\text{H}$ - and  $^{13}\text{C}$ -NMR spectra of **3h** in  $\text{CDCl}_3$  at 500 MHz and 125 MHz, respectively.

**6-Iodo-2-(4-methoxyphenyl)-4-methyl-1,2-dihydroquinazoline 3-oxide (**3h**)**

Yellow solid (0.43 g, 86%),  $R_f$  (5% EtOAc–toluene) 0.60, mp. 176–179 °C;  $\nu_{\text{max}}$  (ATR) 822, 1030, 1203, 1293, 1459, 1515, 1596 ( $\text{C}=\text{N}$ ), 2974, 3269 ( $\text{NH}$ )  $\text{cm}^{-1}$ ;  $^1\text{H}$ -NMR (500 MHz,  $\text{CDCl}_3$ ):  $\delta$  2.18 (s, 3H,  $-\text{CH}_3$ ), 3.54 (s, 3H,  $-\text{OCH}_3$ ), 5.35 (s, 1H, H-2), 5.78 (s, 1H, NH), 6.31 (d,  $J = 8.0$  Hz, 1H, H-8), 6.57 (d,  $J = 8.0$  Hz, 2H, H-3',5'), 7.13 (d,  $J = 8.0$  Hz, 2H, H-2',6'), 7.18 (d,  $J = 8.0$  Hz, 1H, H-7), 7.24 (s, 1H, H-5);  $^{13}\text{C}$ -NMR (125 MHz,  $\text{CDCl}_3$ ):  $\delta$  12.5, 55.5, 79.4, 81.0, 114.1, 114.2, 116.8, 119.7, 128.2, 128.3, 129.7, 133.0, 138.7, 139.3, 139.5, 160.5; HRMS (ES):  $\text{MH}^+$ , calcd for  $\text{C}_{16}\text{H}_{16}\text{N}_2\text{O}_2\text{I}$ : 395.0178; found 395.9600.



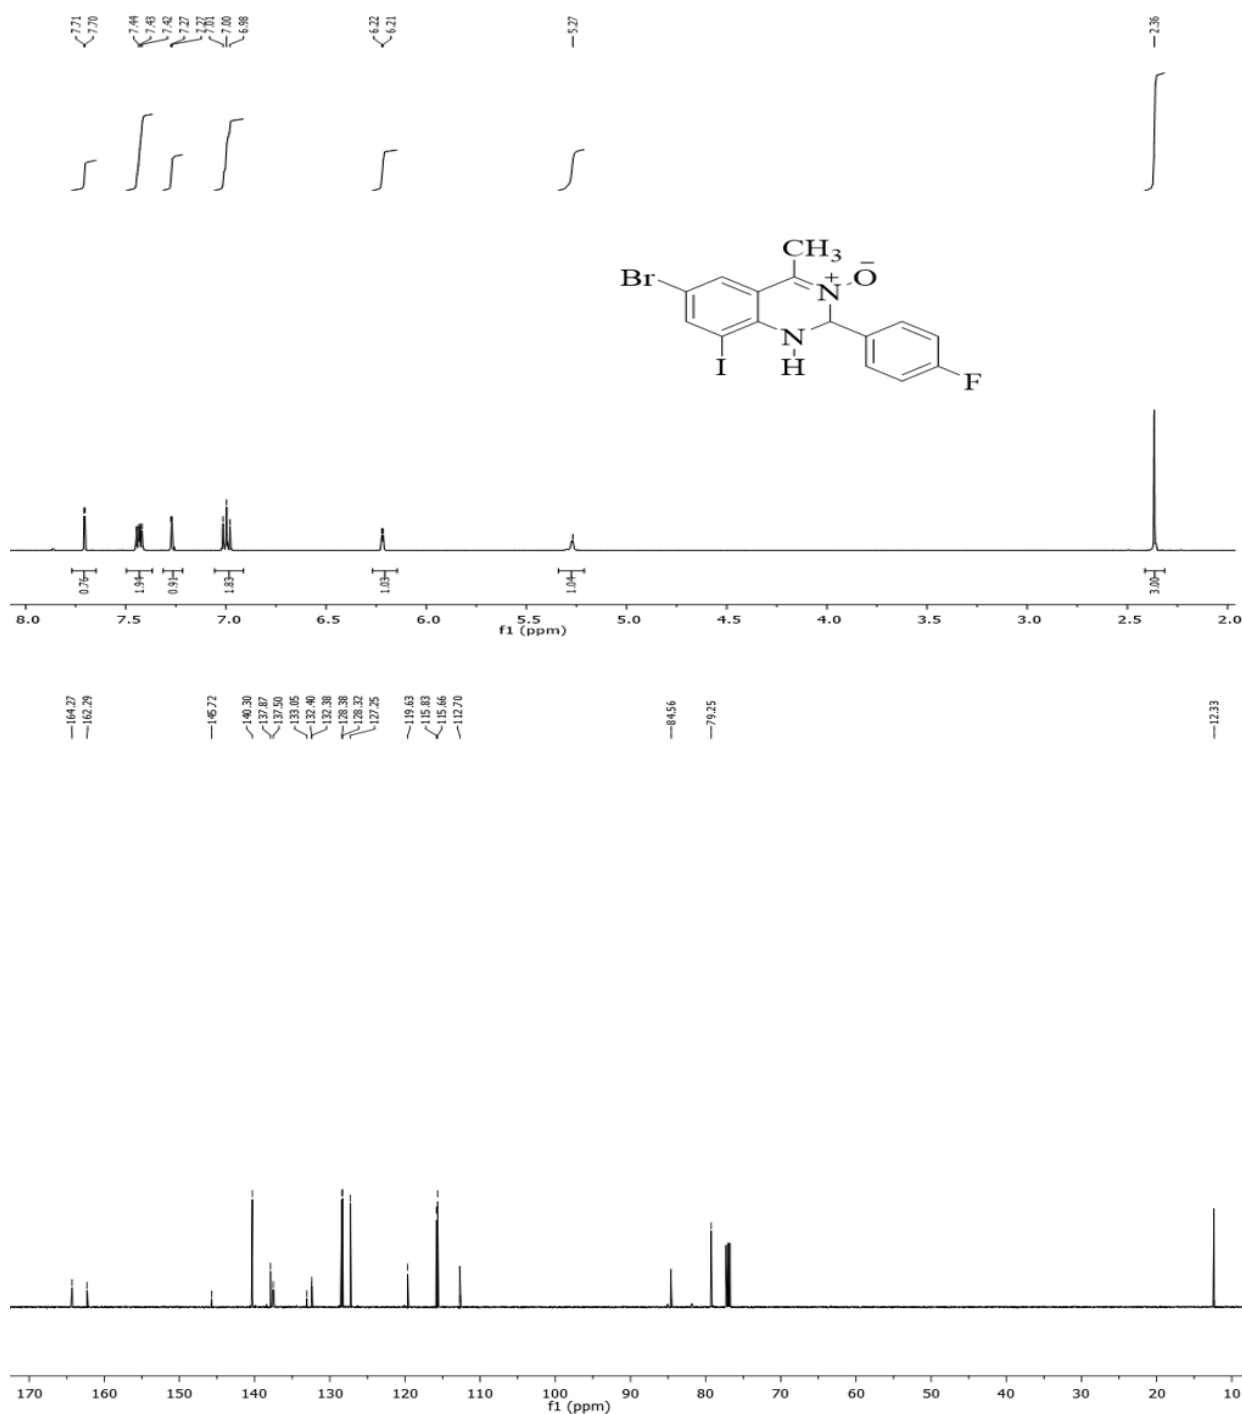

**Fig. S1.14:** <sup>1</sup>H- and <sup>13</sup>C-NMR spectra of **3j** in CDCl<sub>3</sub> at 500 MHz and 125 MHz, respectively.

**6-Bromo-2-(4-fluorophenyl)-8-iodo-4-methyl-1,2-dihydroquinazoline 3-oxide (3j)**

Yellow solid (0.30 g, 60%); *R<sub>f</sub>* (5% EtOAc–toluene) 0.66, mp. 170–173 °C; *v*<sub>max</sub> (ATR) 1010, 1222, 1279, 1404, 1479, 1503, 1602, 2923, 3236, <sup>1</sup>H-NMR (500 MHz, CDCl<sub>3</sub>): δ 2.37 (s, 3H, -CH<sub>3</sub>), 5.27 (s, 1H, H-2), 6.22 (d, *J* = 3.5 Hz, 1H, NH), 6.99 (t, *J* = 8.5 Hz, 2H, H-3',5'), 7.27 (d, *J* = 2.0 Hz, 1H, H-5), 7.43 (dt, *J*<sub>HH</sub> = 8.5 Hz and *J*<sub>HF</sub> = 5.5 Hz, 2H, H-2',6'), 7.71 (d, *J* = 2.0 Hz, 1H, H-7); <sup>13</sup>C-NMR (125 MHz, CDCl<sub>2</sub>): δ 12.3, 79.3, 84.6, 112.7, 115.7 (d, <sup>2</sup>*J*<sub>CF</sub> = 21.3 Hz), 119.6, 127.3, 128.4 (d, <sup>3</sup>*J*<sub>CF</sub> = 7.7 Hz), 132.4 (d, <sup>4</sup>*J*<sub>CF</sub> = 2.5 Hz), 133.1, 137.5, 137.9, 140.3, 145.7, 162.3 (d, <sup>1</sup>*J*<sub>CF</sub> = 247.5 Hz); HRMS (ES): MH<sup>+</sup>, calcd for C<sub>15</sub>H<sub>11</sub>N<sub>2</sub>OBrFI: 460.9083; found 460.8727.

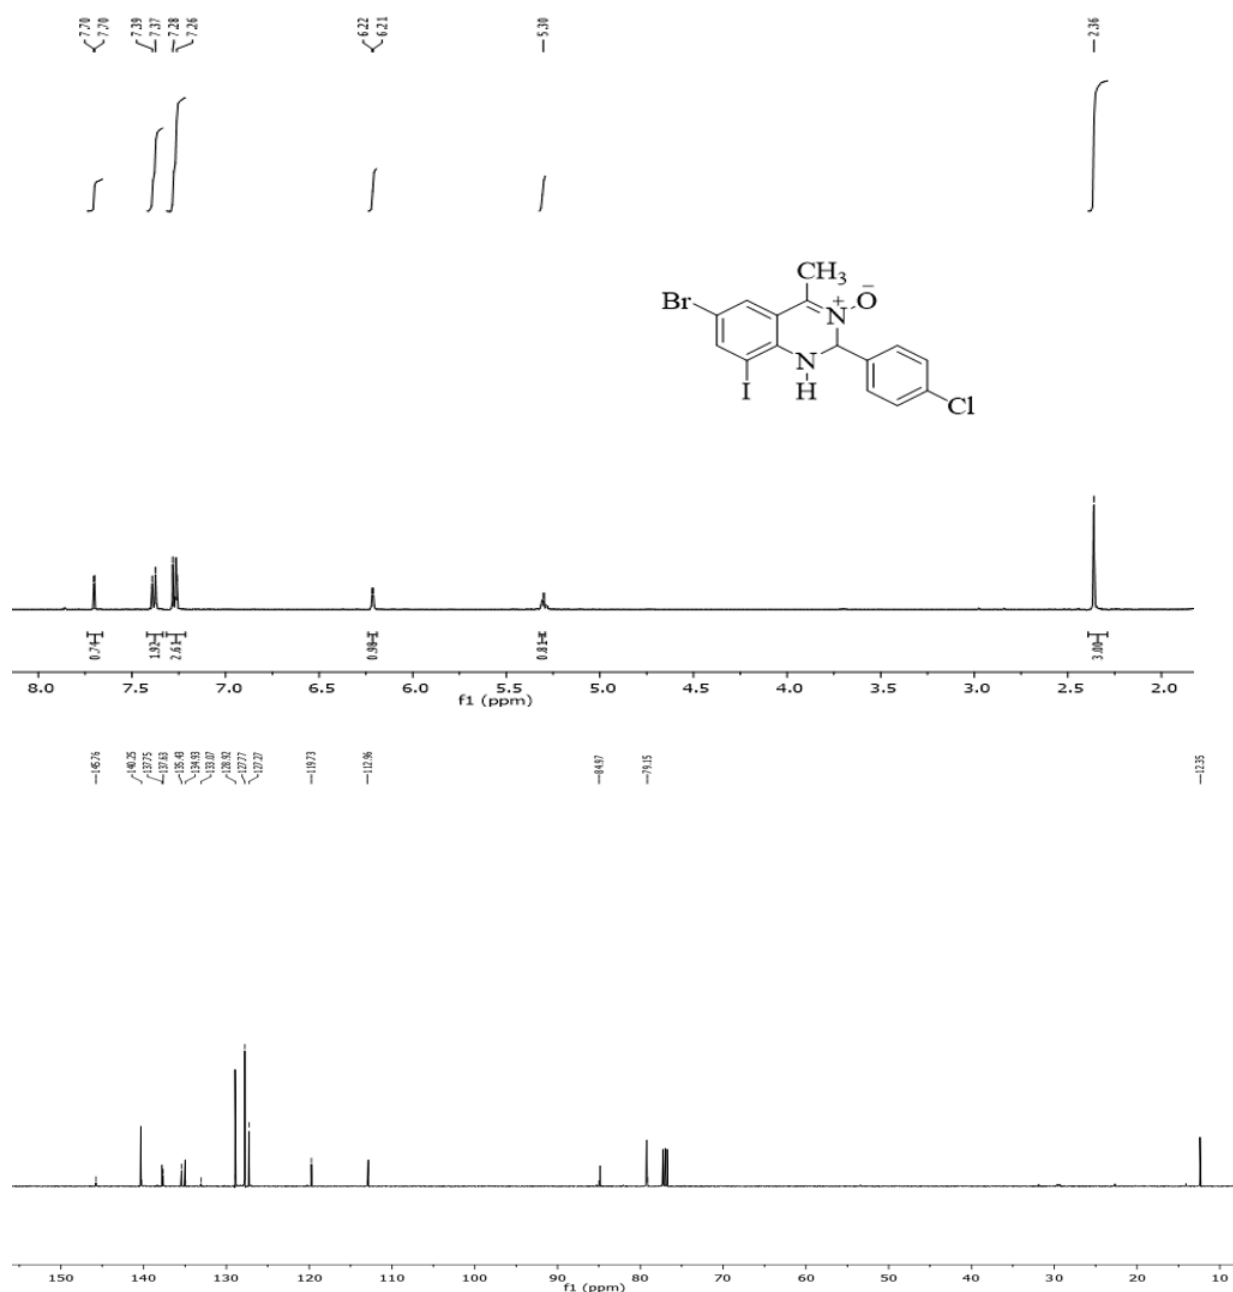

**Fig. S1.15:** <sup>1</sup>H- and <sup>13</sup>C-NMR spectra of **3k** in CDCl<sub>3</sub> at 500 MHz and 125 MHz, respectively.

**6-Bromo-2-(4-chlorophenyl)-8-iodo-4-methyl-1,2-dihydroquinazoline 3-oxide (3k)**

Yellow solid (0.40 g, 80%); *R<sub>f</sub>* (5% EtOAc–toluene) 0.70, mp. 168–170 °C; *v*<sub>max</sub> (ATR) 1172, 1228, 1261, 1399, 1481, 1575, 2916, 2972, 3230; <sup>1</sup>H-NMR (500 MHz, CDCl<sub>3</sub>): δ 2.36 (s, 3H, -CH<sub>3</sub>), 5.29 (s, 1H, H-2), 6.21 (d, *J* = 3.5 Hz, 1H, NH), 7.26 (t, *J* = 2.5 Hz, 2H, H-2',6'), 7.27 (d, *J* = 2.0 Hz, 1H, H-5), 7.28 (d, *J* = 8.0 Hz, 2H, H-3',5'), 7.70 (d, *J* = 2.0 Hz, 1H, H-7); <sup>13</sup>C-NMR (125 MHz, CDCl<sub>3</sub>): δ 12.4, 79.2, 85.0, 113.0, 119.7, 127.3, 127.3, 127.8, 128.9, 133.1, 134.9, 135.4, 137.6, 137.8, 140.3, 145.8; HRMS (ES): *M*H<sup>+</sup>, calcd for C<sub>16</sub>H<sub>14</sub>N<sub>2</sub>O<sub>2</sub>BrI: 472.9283; found 472.9355.



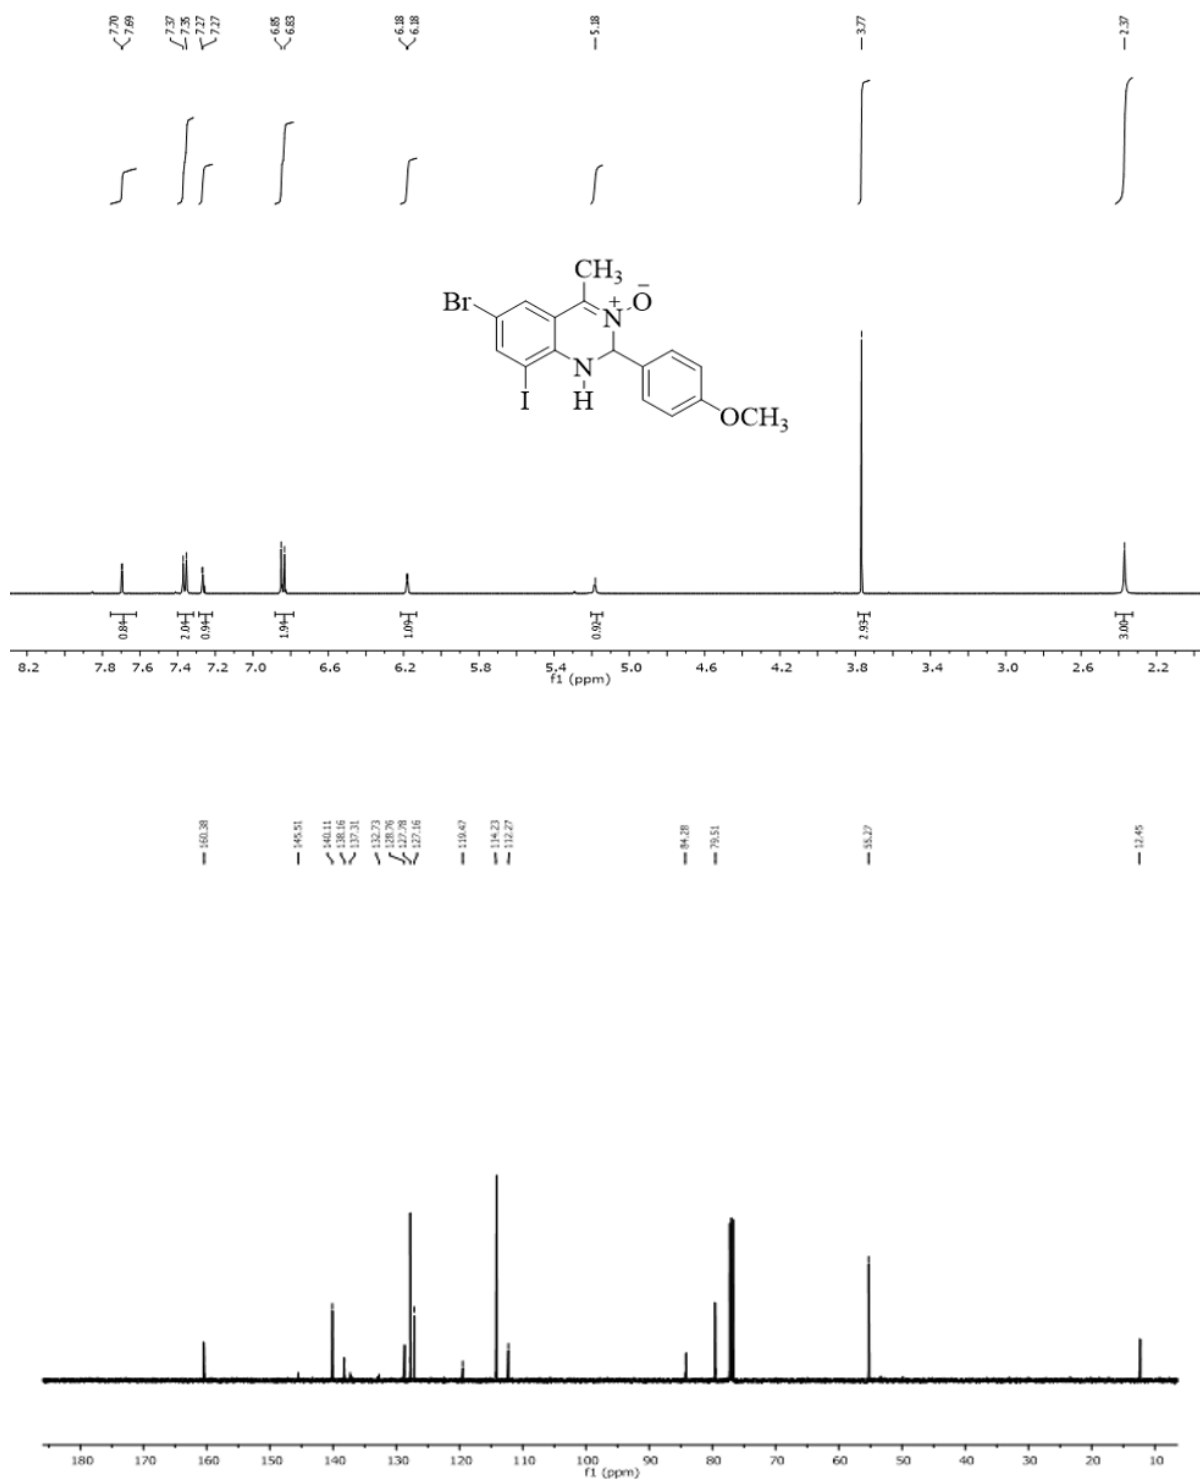

**Fig. S1.16:** <sup>1</sup>H- and <sup>13</sup>C-NMR spectra of **31** in CDCl<sub>3</sub> at 500 MHz and 125 MHz, respectively.

**6-Bromo-8-iodo-2-(4-methoxyphenyl)-4-methyl-1,2-dihydroquinazoline 3-oxide (31)**

Yellow solid (0.42 g, 84%), *R<sub>f</sub>* (5% EtOAc–toluene) 0.63, mp. 153–155 °C; *v*<sub>max</sub> (ATR); 1024, 1168, 1230, 1482, 1503, 1575, 1606, 2968, 3223 cm<sup>-1</sup>; <sup>1</sup>H-NMR (500 MHz, CDCl<sub>3</sub>): δ 2.37 (s, 3H, -CH<sub>3</sub>), 3.77 (s, 3H, -OCH<sub>3</sub>), 5.18 (s, 1H, H-2), 6.18 (d, *J* = 3.0 Hz, 1H, NH), 6.84 (d, *J* = 9.0 Hz, 2H, H-2',6'), 7.27 (d, *J* = 2.0 Hz, 1H, H-5), 7.36 (d, *J* = 8.5 Hz, 2H, H-3',5'), 7.70 (d, *J* = 2.0 Hz, 1H, H-7); <sup>13</sup>C-NMR (125 MHz, CDCl<sub>3</sub>): δ 12.5, 55.4, 79.5, 84.3, 112.3, 114.2, 119.5, 127.2, 127.4, 128.4, 132.7, 137.3, 138.2, 140.1, 145.5, 160.4; HRMS (ES): MH<sup>+</sup>, calcd for C<sub>16</sub>H<sub>14</sub>N<sub>2</sub>O<sub>2</sub>BrI: 472.9283; found 472.9355.

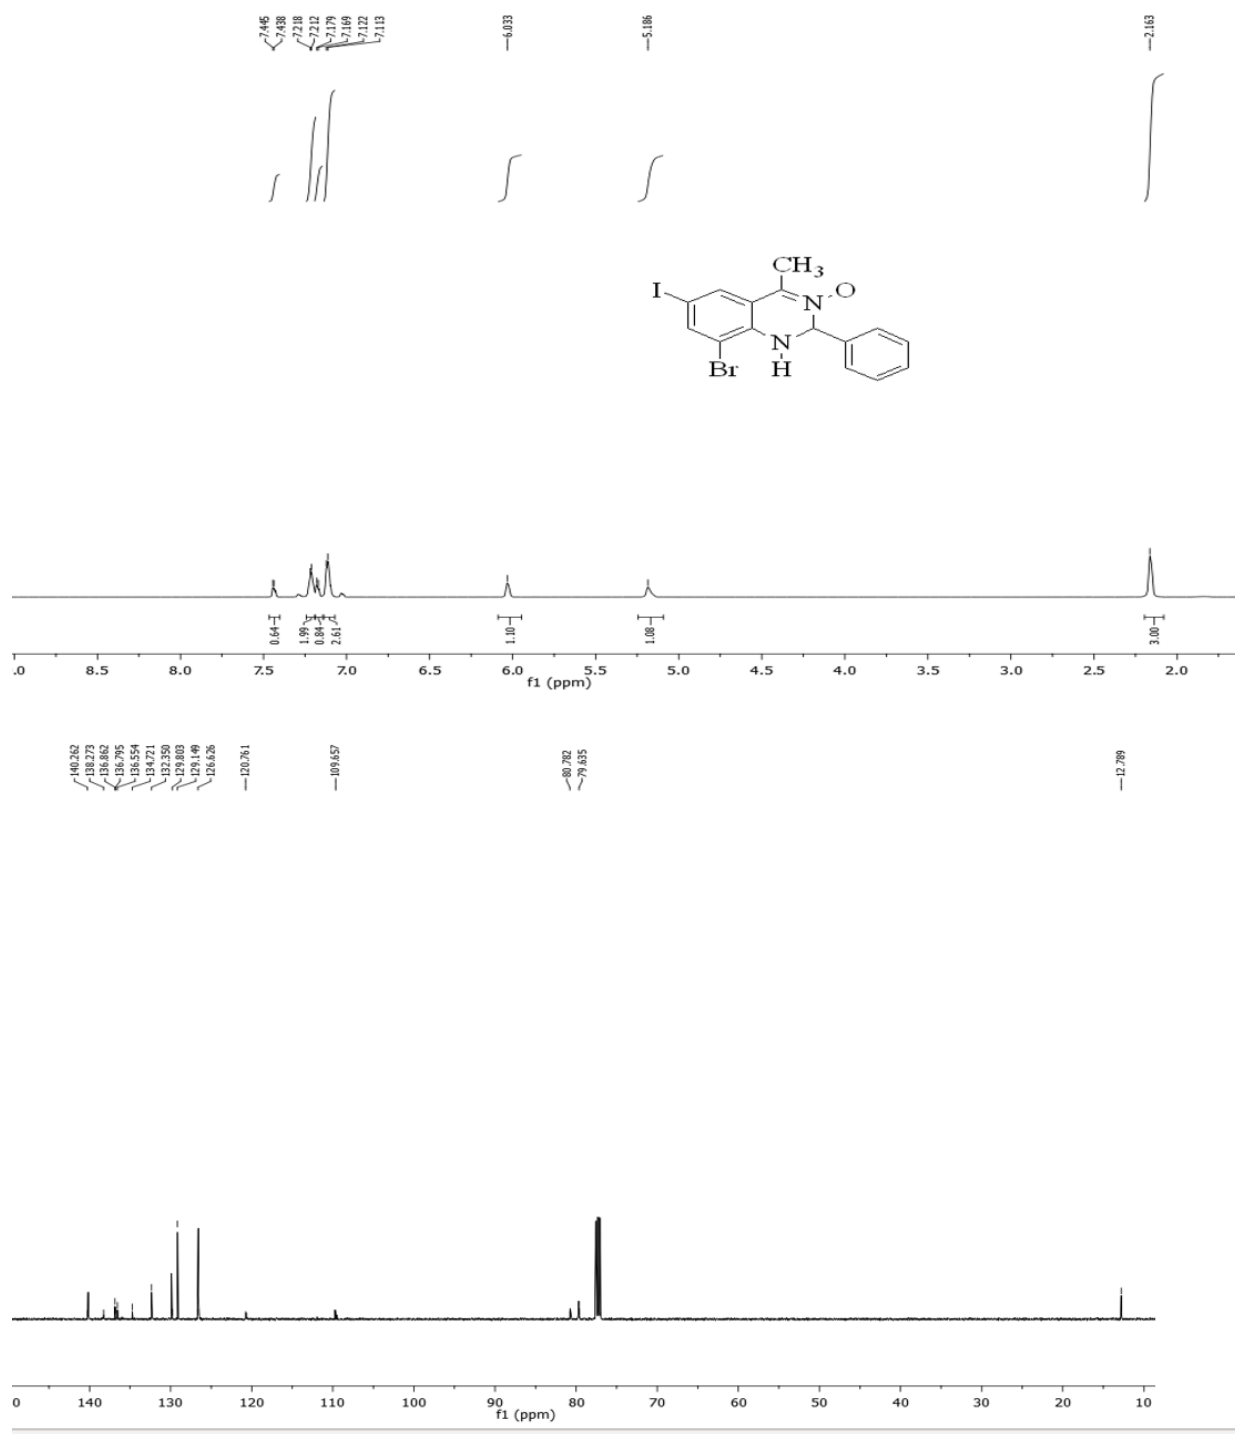

**Fig. S1.17:**  $^1\text{H}$ - and  $^{13}\text{C}$ -NMR spectra of **3m** in  $\text{CDCl}_3$  at 500 MHz and 125 MHz, respectively.

**8-Bromo-6-iodo-4-methyl-2-phenyl-1,2-dihydroquinazoline 3-oxide (3m)**

Yellow solid (0.38 g, 76%),  $R_f$  (5% EtOAc–toluene) 0.62, mp. 180–181 °C;  $\nu_{\text{max}}$  (ATR) 856, 1082, 1184, 1234, 1446, 1485, 1589, 2920, 3250  $\text{cm}^{-1}$ ;  $^1\text{H}$ -NMR (500 MHz,  $\text{CDCl}_3$ ):  $\delta$  2.16 (s, 3H,  $-\text{CH}_3$ ), 5.19 (s, 1H, H-2), 6.03 (s, 1H, NH), 7.12 (d,  $J = 4.5$  Hz, 3H, H-4' and H-2',6'), 7.18 (d,  $J = 3.5$  Hz, 1H, H-5), 7.21 (d,  $J = 3.5$  Hz, 2H, H-7);  $^{13}\text{C}$ NMR (125 MHz,  $\text{CDCl}_3$ ):  $\delta$  12.7, 79.6, 80.9, 109.8, 120.6, 126.7, 129.1, 129.9, 132.4, 134.7, 136.6, 136.8, 138.3, 140.3; HRMS (ES):  $\text{MH}^+$ , calcd for  $\text{C}_{15}\text{H}_{13}\text{N}_2\text{OBrI}$ : 442.9178; found 442.9252.

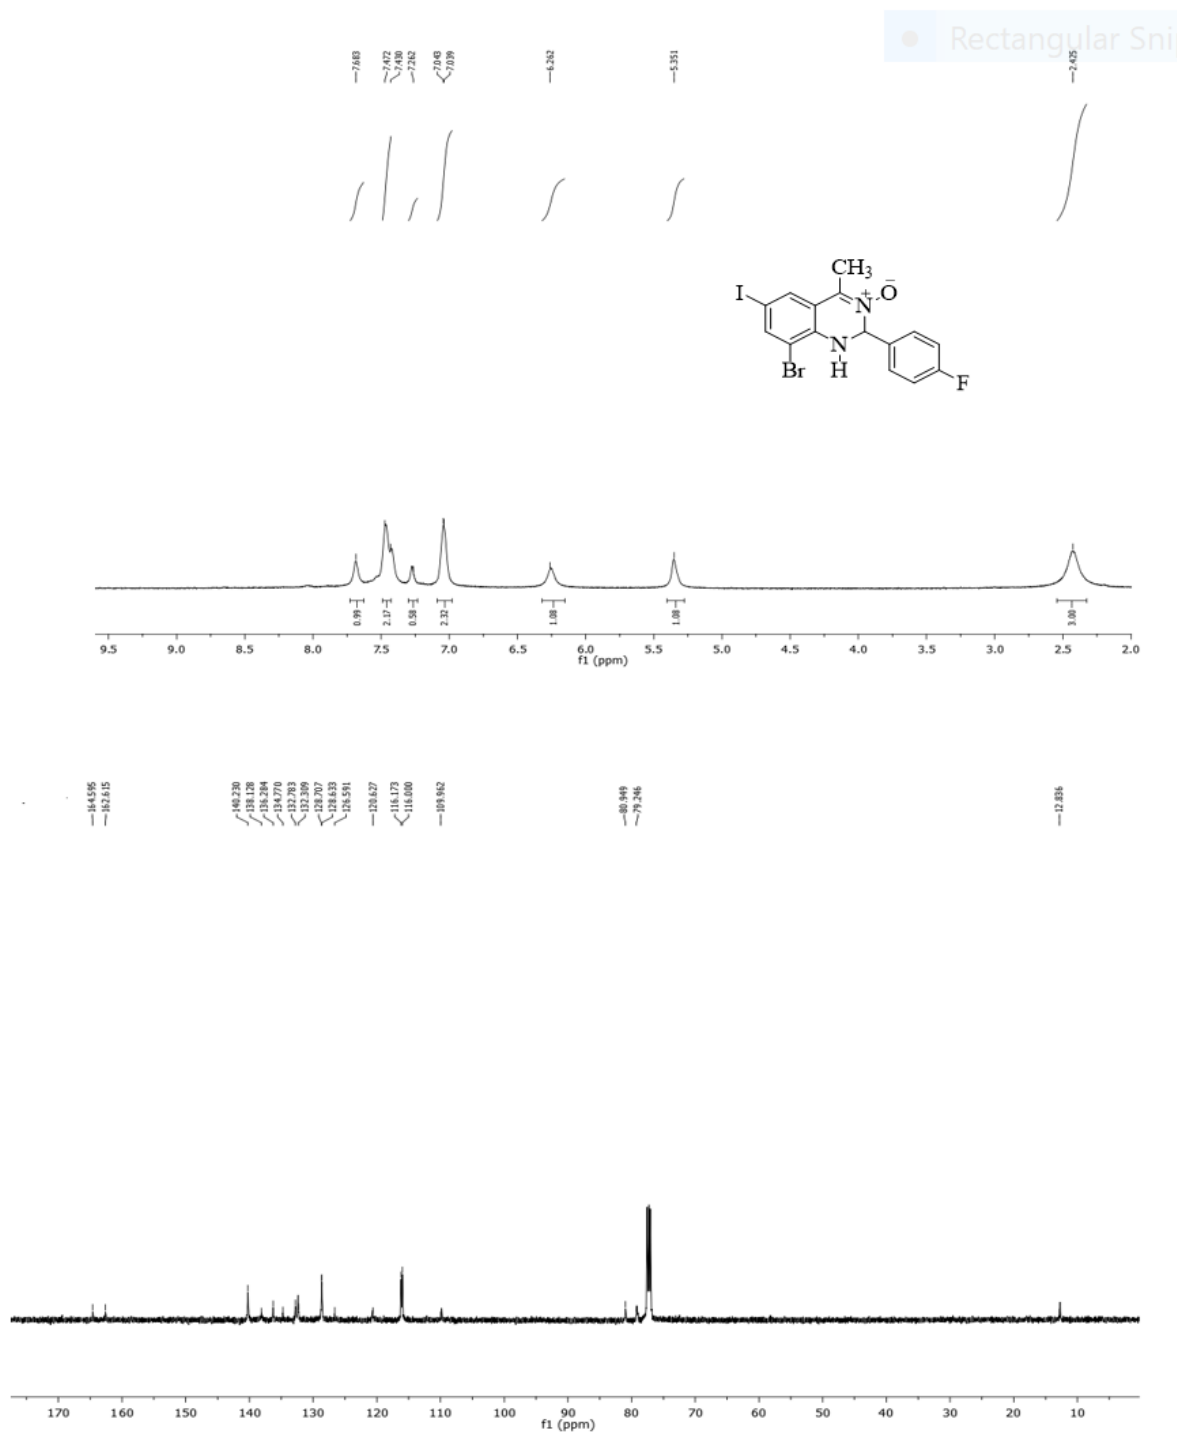

**Fig. S1.18:**  $^1\text{H}$ - and  $^{13}\text{C}$ -NMR spectra of **3n** in  $\text{CDCl}_3$  at 500 MHz and 125 MHz, respectively.

**8-Bromo-2-(4-fluorophenyl)-6-iodo-4-methyl-1,2-dihydroquinazoline 3-oxide (**3n**)**

Yellow solid (0.30 g, 66%),  $R_f$  (5% EtOAc–toluene) 0.64, mp. 125–127 °C;  $\nu_{\text{max}}$  (ATR) 861, 1095, 1187, 1231, 1487, 1591, 1669, 3057, 3278  $\text{cm}^{-1}$ ;  $^1\text{H}$ -NMR (500 MHz,  $\text{CDCl}_3$ ):  $\delta$  2.43 (s, 3H,  $\text{CH}_3$ ), 5.35 (s, 1H, H-2), 6.26 (s, 1H, NH), 7.03 (t,  $J = 2.0$  Hz, 2H, H-3',5'), 7.26 (s, 1H, H-5), 7.43 (2H, d,  $J = 21.0$  Hz, 2H, H-2',6'), 7.68 (s, 1H, H-7);  $^{13}\text{C}$ -NMR (125 MHz,  $\text{CDCl}_3$ )  $\delta$  12.8, 79.2, 80.9, 109.9, 116.0 (d,  $^2J_{\text{CF}} = 21.6$  Hz), 120.6, 126.6, 128.6 (d,  $^3J_{\text{CF}} = 9.0$  Hz), 132.3, 132.7 (d,  $^4J_{\text{CF}} = 2.8$  Hz), 134.8, 136.3, 138.1, 140.2, 162.6 (d,  $^1J_{\text{CF}} = 247.5$ ); HRMS (ES):  $\text{MH}^+$ , calcd for  $\text{C}_{15}\text{H}_{12}\text{N}_2\text{OBrFI}$ : 460.9083; found 460.9149.

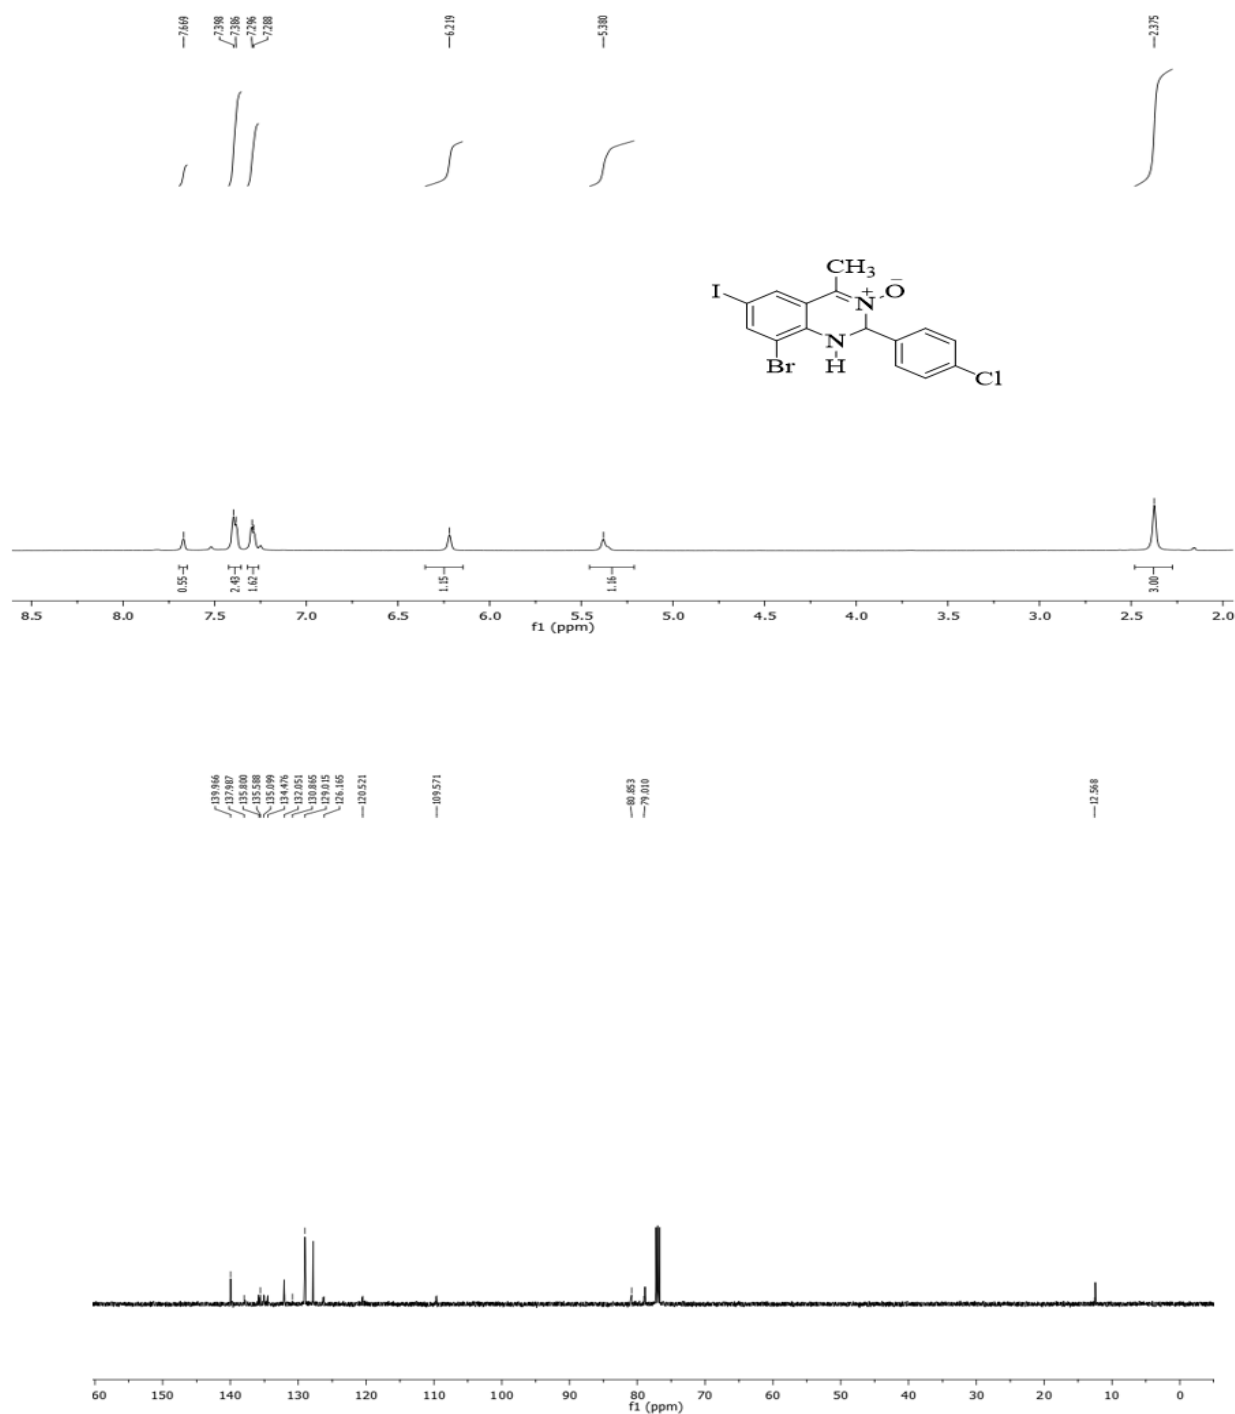

**Fig. S1.19:** <sup>1</sup>H- and <sup>13</sup>C-NMR spectra of **3o** in CDCl<sub>3</sub> at 500 MHz and 125 MHz, respectively.

8-Bromo-2-(4-chlorophenyl)-6-iodo-4-methyl-1,2-dihydroquinazoline 3-oxide (**3o**)

Yellow solid (0.49 g, 98%), *R<sub>f</sub>* (5% EtOAc–toluene) 0.65, mp. 140–142 °C; *v*<sub>max</sub> (ATR) 856, 1082, 1184, 1234, 1446, 1485, 1589, 2920, 3250 cm<sup>-1</sup>; <sup>1</sup>H-NMR (500 MHz, CDCl<sub>3</sub>): δ 2.38 (s, 3H, CH<sub>3</sub>), 5.38 (s, 1H, H-2), 6.22 (s, 1H, NH), 7.29 (d, *J* = 4.0 Hz, 2H, H-2',6'), 7.39 (d, *J* = 6.0 Hz, 3H, H-3',5' and H-5), 7.69 (s, 1H, H-7); <sup>13</sup>CNMR (125 MHz, CDCl<sub>3</sub>): δ 12.6, 79.0, 80.8, 109.6, 120.5, 126.2, 129.0, 130.8, 132.1, 134.5, 135.1, 135.6, 135.8, 137.9, 139.9; HRMS (ES): MH<sup>+</sup>, calcd for C<sub>15</sub>H<sub>12</sub>N<sub>2</sub>OBrClI: 476.8788; found 476.8388.

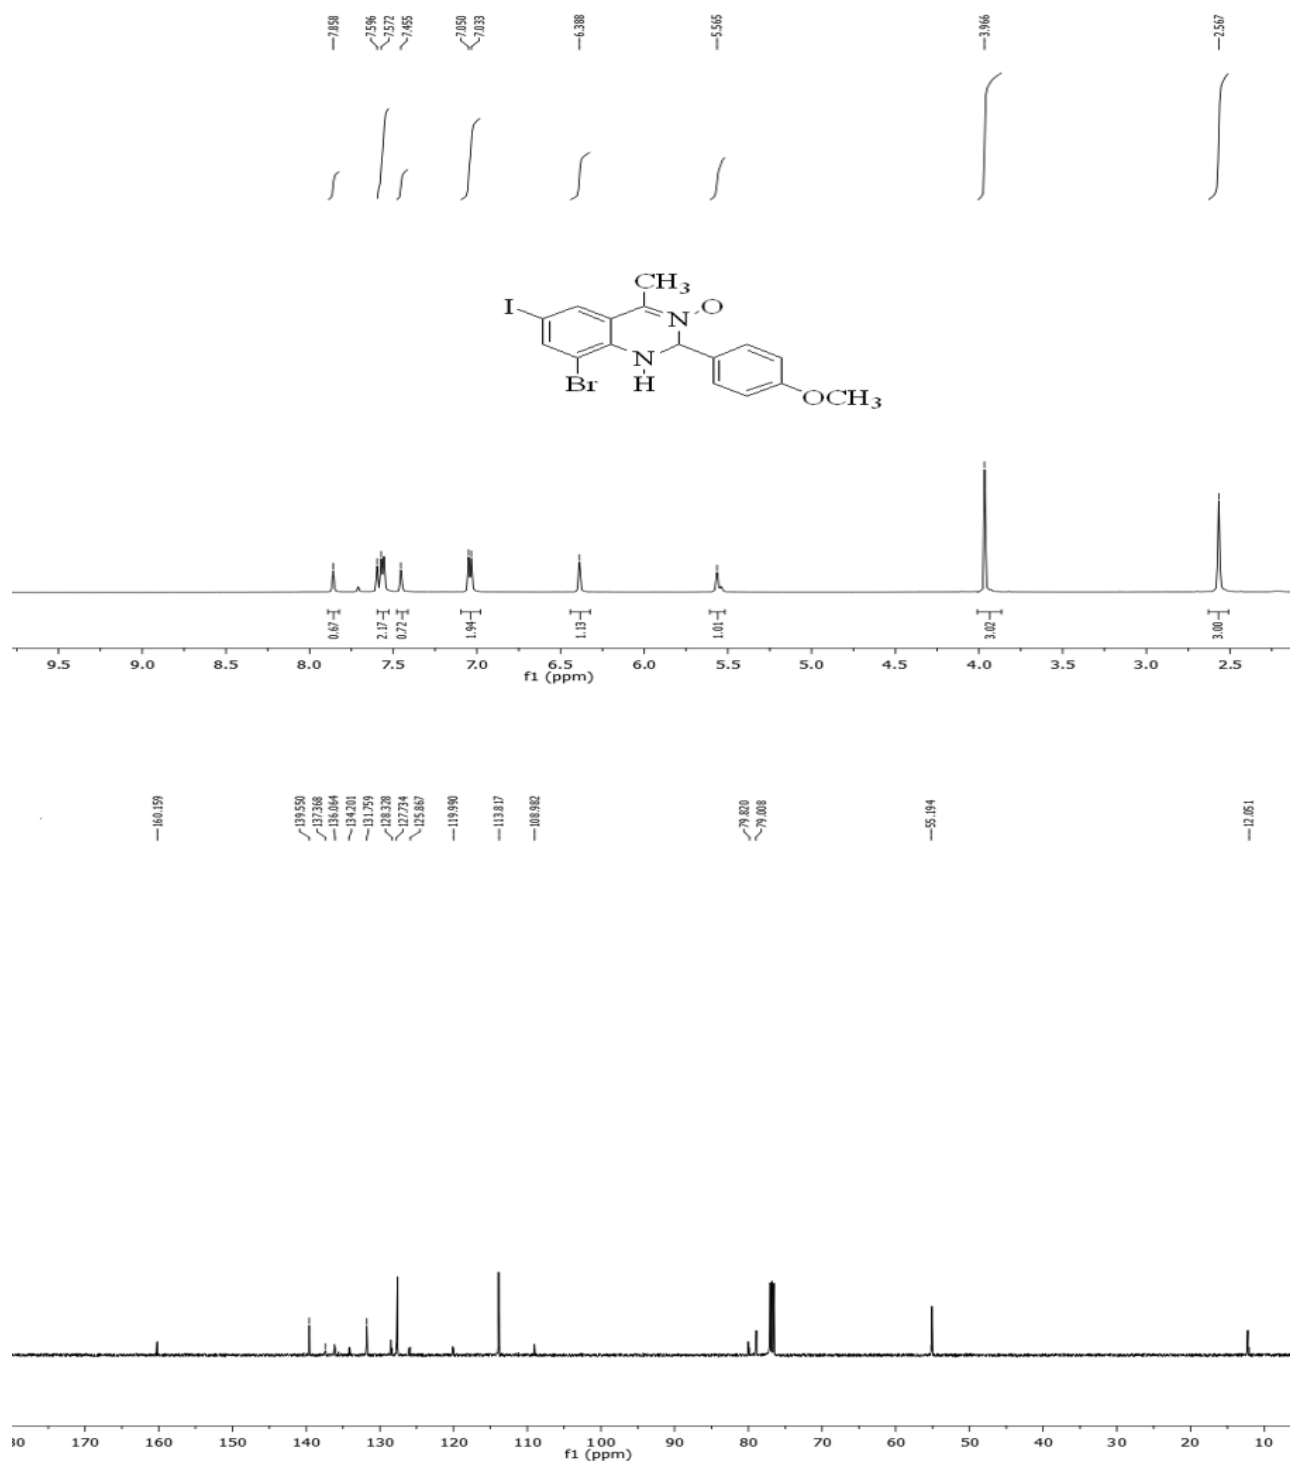

**Fig. S1.20:** <sup>1</sup>H- and <sup>13</sup>C-NMR spectra of **3p** in CDCl<sub>3</sub> at 500 MHz and 125 MHz, respectively.

8-bromo-6-iodo-2-(4-methoxyphenyl)-4-methyl-1,2-dihydroquinazoline 3-oxide (**3p**)

Yellow solid (0.47 g, 94%), *R<sub>f</sub>* (5% EtOAc–toluene) 0.60, mp. 173–174 °C; *v*<sub>max</sub> (ATR) 856, 1082, 1184, 1234, 1446, 1485, 1589, 2920, 3250 cm<sup>-1</sup>; <sup>1</sup>H-NMR (500 MHz, CDCl<sub>3</sub>): δ 2.57 (s, 3H, CH<sub>3</sub>), 3.97 (s, 3H, OCH<sub>3</sub>), 5.57 (s, 1H, H-2), 6.39 (s, 1H, NH), 7.04 (d, *J* = 10 Hz, 2H, H-3',5'), 7.46 (s, 1H, H-5), 7.58 (d, *J* = 12 Hz, 2H, H-2',6'), 7.86 (s, 1H, H-7); <sup>13</sup>C-NMR (125 MHz, CDCl<sub>3</sub>): δ 12.1, 55.2, 79.0, 79.8, 108.9, 113.8, 119.9, 125.9, 127.7, 128.3, 131.8, 134.2, 136.1, 137.4, 139.6, 160.2; HRMS (ES): MH<sup>+</sup>, calcd for C<sub>16</sub>H<sub>15</sub>N<sub>2</sub>O<sub>2</sub>BrI: 472.9283; found 472.9385.

**Table S1:** X-ray analysis, crystal data and structure refinement for **3i**Data collection and refinement of **3i**

Intensity data was determined on a Bruker Venture D8 Photon CMOS diffractometer with graphite-monochromated MoK $\alpha_1$  ( $\lambda = 0.71073$  Å) radiation at 173(2) K using an Oxford Cryostream 600 cooler. Data reduction, empirical absorption corrections and space group assignments were carried out using the program SAINT+ version 6.02, SADABS and XPREP, respectively [3]. The structure was solved in the WinGX [4] Suite of programs, using intrinsic phasing through SHELXT [5] and refined using full-matrix least-squares/difference Fourier techniques on  $F^2$  using SHELXL-2017 [6]. All C-bound hydrogen atoms were placed at idealized positions and refined as riding atoms with isotropic parameters 1.2 or 1.5 times those of their parent atoms. The N-bound hydrogen atom was located in the difference Fourier Map and fractional coordinates and isotropic displacement parameter refined freely. Diagrams and publication material were generated using ORTEP-3 [4] and PLATON [7].

Crystal data and structure refinement for **3i**

|                                               | <b>2a</b>                                                          |
|-----------------------------------------------|--------------------------------------------------------------------|
| CCDC                                          | 2266298                                                            |
| Empirical formula                             | C <sub>15</sub> H <sub>12</sub> BrIN <sub>2</sub> O                |
| Formula weight                                | 443.08                                                             |
| Crystal system                                | Monoclinic                                                         |
| Space group                                   | $P2_1/n$                                                           |
| a, b, c (Å)                                   | 7.5889(3), 8.3516(3), 9.0732(4)                                    |
| $\beta$ (°)                                   | 90.312(5)                                                          |
| Volume (Å <sup>3</sup> )                      | 1540.4(3)                                                          |
| Z                                             | 4                                                                  |
| $\rho_{\text{calc}}$ (g/cm <sup>3</sup> )     | 1.911                                                              |
| $\mu$ (mm <sup>-1</sup> )                     | 4.669                                                              |
| F(000)                                        | 848                                                                |
| Crystal size (mm <sup>3</sup> )               | 0.395 x 0.279 x 0.072                                              |
| $\theta_{\text{min}}/\theta_{\text{max}}$ (°) | 2.163/28.000                                                       |
| Index ranges                                  | $-14 \leq h \leq 14$ , $-10 \leq k \leq 10$ , $-24 \leq l \leq 24$ |
| Reflections collected                         | 53714                                                              |
| Independent reflections                       | 3717 [R(int) = 0.0659]                                             |
| Data/restraints/parameters                    | 3717 / 0 / 186                                                     |
| Goodness-of-fit on $F^2$                      | 1.042                                                              |
| Final R indexes [ $I \geq 2\sigma(I)$ ]       | $R_1 = 0.0240$ , $wR_2 = 0.0622$                                   |
| Final R indexes [all data]                    | $R_1 = 0.0263$ , $wR_2 = 0.0637$                                   |
| Largest diff. peak/hole (e.Å <sup>-3</sup> )  | 1.318 and -1.060                                                   |

## References

1. Ye, X.; Chen, Z.; Zhang, Z.; Fu, Y.; Deng, Z.; Peng, Y. An convenient approach to 2,4-disubstituted quinazoline-3-oxides using active MnO<sub>2</sub> as oxidant. *Canadian J. Chem.* **2019**, *97*, 682–689.
2. Mphahlele, M.J.; Magwaza, N.M.; Gildenhuys, S.; Setshedi, I.B. Synthesis,  $\alpha$ -glucosidase inhibition, and antioxidant activity of the 7-carbo-substituted 5-bromo-3-methylindazoles. *Bioorg. Chem.* **2020**, *97*, 103702.
3. Bruker, APEX-3, SAINT+, Version 6.02 (Includes XPREP and SADABS), Bruker AXS Inc., Madison, Wisconsin, USA, **2016**.
4. Farrugia, L.J. WinGX and ORTEP for Windows an update. *J. Appl. Crystallogr.* **2012**, *245*, 849–854.
5. Sheldrick, G.M. SHELXT-Integrated space-group and crystal-structure determination. *Acta Cryst.* **2015**, *71*, 3–8.
6. Sheldrick, G.M. SHELXL-2017/1. *Acta Crystallogr.* **2015**, *C71*, 3–8.
7. Spek, A.L. Structure validation in chemical crystallography. *Acta Cryst.* **2009**, *D65*, 148–155.

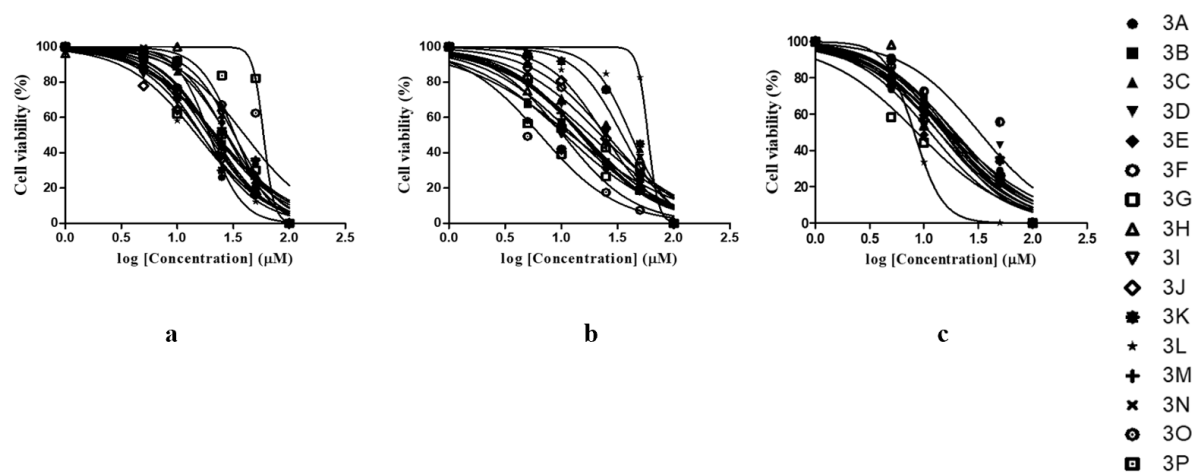

**Fig. S2:** Graphs showing dose-dependent effect on cell viability in MCF-7 (a), A549 (b) and HEK293-T (c).

**Table S2:** Cell viability percentage of compounds **3a–p** against MCF-7 cell line.

| Conc. | 3A      | 3B      | 3C      | 3D      | 3E      | 3F      | 3G      | 3H      | 3I      | 3J      | 3K      | 3L      | 3M      | 3N      | 3O      | 3P      |
|-------|---------|---------|---------|---------|---------|---------|---------|---------|---------|---------|---------|---------|---------|---------|---------|---------|
| 50    | 19,6607 | 30,3061 | 37,2256 | 38,6394 | 17,2488 | 23,6814 | 33,9155 | 37,5083 | 18,1803 | 22,7375 | 38,1737 | 17,5102 | 17,6314 | 30,1896 | 23,0428 | 27,8817 |
| 25    | 22,3387 | 33,8157 | 41,6999 | 43,2136 | 19,7272 | 32,649  | 35,8117 | 41,2009 | 19,5775 | 30,7493 | 38,7891 | 35,1896 | 20,6088 | 31,7365 | 38,7891 | 43,212  |
| 10    | 23,187  | 35,1963 | 42,5981 | 44,0286 | 23,6194 | 44,9558 | 36,5769 | 43,1304 | 22,1058 | 40,413  | 39,6041 | 51,5919 | 20,9415 | 31,9528 | 39,6041 | 59,2339 |
| 5     | 26,1144 | 38,34   | 44,7938 | 46,8729 | 22,0559 | 62,4071 | 37,841  | 44,5775 | 22,006  | 53,8289 | 41,6001 | 55,5856 | 24,1517 | 33,2335 | 41,6001 | 70,8112 |
| 1     | 26,2641 | 39,7538 | 46,7898 | 47,0559 | 27,8443 | 69,8879 | 42,0991 | 45,0932 | 24,1184 | 60,354  | 42,1823 | 66,3742 | 25,998  | 34,8969 | 46,2908 | 72,4624 |

**Table S3:** Cell viability percentage of compounds **3a–p** against the A549 cell line.

| Conc. | 3A      | 3B      | 3C      | 3D      | 3E      | 3F      | 3G      | 3H      | 3I      | 3J      | 3K      | 3L      | 3M      | 3N      | 3O      | 3P      |
|-------|---------|---------|---------|---------|---------|---------|---------|---------|---------|---------|---------|---------|---------|---------|---------|---------|
| 50    | 30,5771 | 28,8446 | 29,5534 | 39,174  | 30,3184 | 32,7708 | 33,0296 | 38,362  | 23,0847 | 29,7109 | 32,6808 | 45,4944 | 30,0709 | 30,3521 | 39,174  | 39,3879 |
| 25    | 41,1182 | 42,7495 | 41,782  | 44,944  | 40,2408 | 44,212  | 43,0757 | 56,0806 | 43,9195 | 42,6257 | 42,682  | 45,5732 | 42,2995 | 43,4807 | 44,944  | 42,5649 |
| 10    | 54,0443 | 56,1818 | 54,3481 | 46,8555 | 52,0419 | 61,143  | 50,6131 | 64,8667 | 61,098  | 57,7455 | 60,0068 | 60,333  | 61,413  | 62,0205 | 46,8555 | 43,6627 |
| 5     | 57,3068 | 60,8505 | 66,5879 | 66,5487 | 64,338  | 71,9204 | 56,2268 | 86,9389 | 69,8954 | 67,1729 | 73,6416 | 82,1465 | 68,6691 | 73,2703 | 66,5487 | 44,7771 |
| 1     | 66,8354 | 69,0066 | 73,4391 | 67,7876 | 74,9578 | 82,3715 | 72,7416 | 87,7714 | 84,0927 | 79,064  | 78,5578 | 89,6276 | 78,1978 | 79,9753 | 67,7876 | 45,0433 |

**Table S4:** Cell viability percentage of compounds **3a–p** against the HEK293-T cell line.

| Conc. | 3A      | 3B      | 3C      | 3D      | 3E      | 3F      | 3G      | 3H      | 3I      | 3J      | 3K      | 3L      | 3M      | 3N      | 3O      | 3P      |
|-------|---------|---------|---------|---------|---------|---------|---------|---------|---------|---------|---------|---------|---------|---------|---------|---------|
| 50    | 19,0443 | 35,7618 | 23,5044 | 17,6402 | 20,0236 | 14,6903 | 17,0502 | 28,1437 | 26,8962 | 19,351  | 24,0118 | 19,7272 | 19,1032 | 20,4602 | 37,658  | 18,3835 |
| 25    | 55,0679 | 38,4731 | 34,1829 | 30,5988 | 31,941  | 36,7198 | 31,41   | 29,6574 | 29,8237 | 33,8879 | 31,5988 | 25,4809 | 41,9705 | 39,5988 | 44,2282 | 74,7257 |
| 10    | 57,8407 | 40,3194 | 50,3009 | 54,1003 | 40,0236 | 47,7522 | 41,062  | 30,7718 | 33,7658 | 54,4779 | 42,5133 | 59,208  | 51,1032 | 54,1003 | 44,3945 | 75,7994 |
| 5     | 63,351  | 41,3007 | 62,9381 | 60,0531 | 60,0118 | 55,2212 | 46,5251 | 32,5682 | 33,8656 | 72,767  | 55,3864 | 69,4229 | 75,0089 | 70,0531 | 44,5609 | 81,4277 |
| 1     | 69,3687 | 41,5502 | 64,6608 | 75,0561 | 69,7463 | 71,9646 | 63,41   | 33,3001 | 34,8969 | 67,5634 | 61,3333 | 80,3803 | 81,2389 | 75,0561 | 45,1763 | 83,4336 |



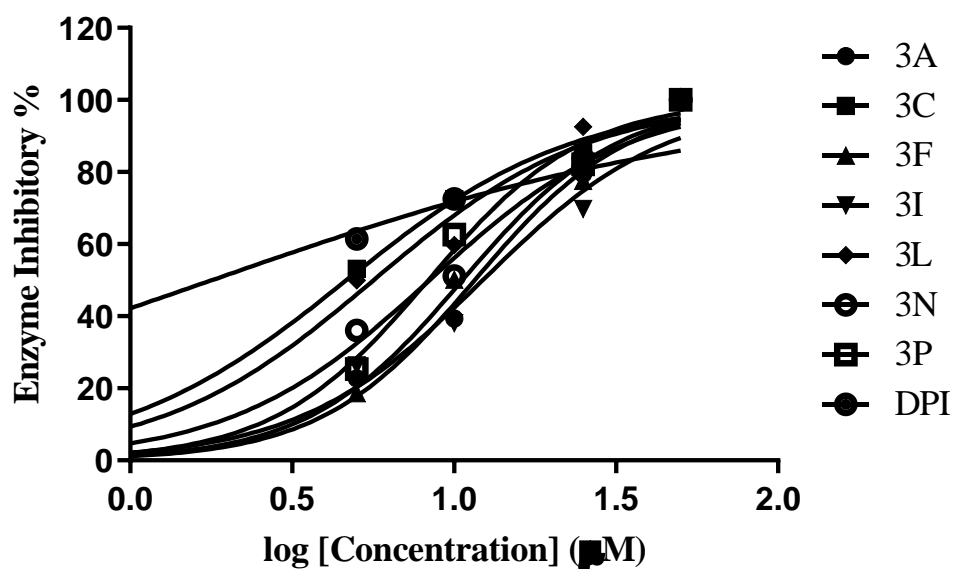

Fig. S3: Graphs of % inhibition of SOD used to calculate  $IC_{50}$  values.

Table S5: Binding energies of **3a**, **3c**, **3f**, **3i**, **3l** and **3p** docked into  $\alpha$ -glucosidase and  $\alpha$ -amylase

| Compound  | Binding energy (kcal/mol) |                   |
|-----------|---------------------------|-------------------|
|           | $\alpha$ -glucosidase     | $\alpha$ -amylase |
| <b>3a</b> | -19.5004                  | -9.4692           |
| <b>3c</b> | -23.5707                  | -36.8609          |
| <b>3f</b> | -27.3552                  | -32.4730          |
| <b>3i</b> | -21.2141                  | -18.1673          |
| <b>3l</b> | -22.5943                  | -37.7027          |
| <b>3p</b> | -22.5534                  | -39.0532          |
| Acarbose  | -35.1447                  | -25.2018          |

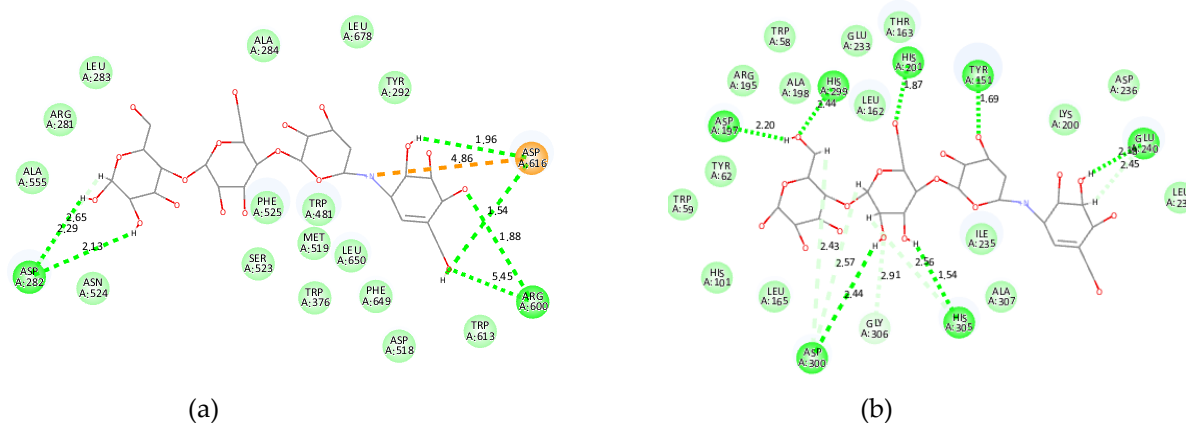

Fig. S4: Docking poses of acarbose against  $\alpha$ -glucosidase (a) and  $\alpha$ -amylase (b). Interaction types are marked with dashed lines and are color-coded as follows: Bright green- conventional hydrogen bond; lighter green van der Waals interaction; very light green- carbon-hydrogen bond; orange is a salt bridge or attractive charge or pi-anion.
